1

## 2 **Depletion of Ric-8B leads to reduced mTORC2 activity**

3

4

5

6 Maíra H. Nagai<sup>1</sup>, Luciana M. Gutiyama<sup>1#</sup>, Victor P. S. Xavier<sup>1</sup>, Cleiton F. Machado<sup>1</sup>,  
7 Alice H. Reis<sup>2</sup>, Elisa R. Donnard<sup>3</sup>, Pedro A. F. Galante<sup>3</sup>, Jose G. Abreu<sup>2</sup>, William T.  
8 Festuccia<sup>4</sup> and Bettina Malnic<sup>1\*</sup>

9

10

11 <sup>1</sup>Department of Biochemistry, University of São Paulo, Av. Prof. Lineu Prestes,  
12 748, CEP 05508-000, São Paulo, SP, Brazil.

13

14 <sup>2</sup> Institute of Biomedical Sciences, Federal University of Rio de Janeiro, Rio de  
15 Janeiro, RJ, Brazil.

16

17 <sup>3</sup> Centro de Oncologia Molecular, Hospital Sírio-Libanês, São Paulo, Brazil.

18

19 <sup>4</sup>Department of Physiology and Biophysics, Institute of Biomedical Sciences,  
20 University of São Paulo, São Paulo, SP, Brazil.

21

22 #Current address: Centro de Transplante de Medula Óssea, Instituto Nacional do  
23 Câncer, Rio de Janeiro, RJ, Brazil.

24

25

26

27 \* Corresponding author: Bettina Malnic

28 E-mail: [bmalnic@iq.usp.br](mailto:bmalnic@iq.usp.br)

29

30

31

32

33

## 34 **Abstract**

35 mTOR, a serine/threonine protein kinase that is involved in a series of critical  
36 cellular processes, can be found in two functionally distinct complexes, mTORC1  
37 and mTORC2. In contrast to mTORC1, little is known about the mechanisms that  
38 regulate mTORC2. Here we show that mTORC2 activity is reduced in mice with a  
39 hypomorphic mutation of the Ric-8B gene. Ric-8B is a highly conserved protein  
40 that acts as a non-canonical guanine nucleotide exchange factor (GEF) for  
41 heterotrimeric G $\alpha$ s/olf type subunits. We found that Ric-8B hypomorph embryos  
42 are smaller than their wild type littermates, fail to close the neural tube in the  
43 cephalic region and die during mid-embryogenesis. Comparative transcriptome  
44 analysis revealed that signaling pathways involving GPCRs and G proteins are  
45 dysregulated in the Ric-8B mutant embryos. Interestingly, this analysis also  
46 revealed an unexpected impairment of the mTOR signaling pathway.  
47 Phosphorylation of Akt at Ser 473 is downregulated in the Ric-8B mutant embryos,  
48 indicating a decreased activity of mTORC2. In contrast, phosphorylation of S6, a  
49 downstream target of mTORC1, is unaltered. Knockdown of the endogenous Ric-  
50 8B gene in HEK293T cells leads to reduced phosphorylation levels of Akt at Ser  
51 473, but not of S6, further supporting the selective involvement of Ric-8B in  
52 mTORC2 activity. Our results reveal a crucial role for Ric-8B in development and  
53 provide novel insights into the signals that regulate mTORC2 activity.

54

## 55 **Author Summary**

56 Gene inactivation in mice can be used to identify genes that are involved in  
57 important biological processes and that may contribute to disease. By using this  
58 approach, we found that the Ric-8B gene is essential for embryogenesis and for  
59 the normal development of the nervous system. Ric-8B mutant mouse embryos are  
60 smaller than their wild type littermates and show neural tube defects at the cranial  
61 region. This approach also allowed us to identify the biological pathways that are  
62 involved in the observed phenotypes, the G protein and mTORC2 signaling  
63 pathways. mTORC2 plays particular important roles also in the adult brain, and has  
64 been implicated in neurological disorders. Ric-8B is highly conserved in mammals,  
65 including humans. Our mutant mice provide a model to study the complex  
66 molecular and cellular processes underlying the interplay between Ric-8B and  
67 mTORC2 in neuronal function.

68

69

## 70 **Introduction**

71 Ric-8B (resistant to inhibitors of cholinesterase 8B) is a highly conserved protein  
72 which interacts with  $G\alpha_s$  class subunits from heterotrimeric G proteins [1,2]. *In*  
73 *vitro*, Ric-8B can work as a guanine nucleotide exchange factor (GEF) for both  $G\alpha_s$   
74 and  $G\alpha_{olf}$  [1,3]. While  $G\alpha_s$  is ubiquitously expressed,  $G\alpha_{olf}$  is restrictedly  
75 expressed in the olfactory neurons and in a few regions of the brain, such as the  
76 striatum [4-6]. Ric-8B expression in adult mice is highly predominant in the same  
77 tissues where  $G\alpha_{olf}$  is expressed indicating that these two proteins are functional  
78 partners *in vivo* [2]. Consistent with the role of a GEF, Ric-8B is able to amplify  
79 odorant receptor signaling or dopamine receptor signaling through  $G\alpha_{olf}$  in  
80 cultured cells [2,7-9]. Also, a series of studies indicate that Ric-8B regulates  $G\alpha$   
81 protein abundance in the cells, and suggest that Ric-8B may serve as a chaperone  
82 that promotes  $G\alpha$  protein stability and the formation of functional G protein  
83 complexes [7,8,10-13].

84

85 In addition to the full-length Ric-8B, an alternatively spliced version of Ric-8B  
86 lacking exon 9, denominated Ric-8B $\Delta$ 9, is also highly expressed in the olfactory  
87 epithelium. Differently from full-length Ric-8B, Ric-8B $\Delta$ 9 does not bind to  $G\alpha_s$  and  
88 does not show GEF activity, or does it very inefficiently [2,3]. Studies have shown  
89 that both, Ric-8B and Ric-8B $\Delta$ 9 are able to interact with the different  $G\gamma$  subunit  
90 types,  $G\gamma_{13}$ ,  $G\gamma_7$  and  $G\gamma_8$  [10]. Chan and colleagues showed that Ric-8B $\Delta$ 9, but  
91 not full-length Ric-8B, can bind  $G\beta_1\gamma_2$  [3]. These results suggest that besides

92 acting on the  $G\alpha_s$  subunits, the Ric-8B proteins may also play a role in  $G\beta\gamma$   
93 signaling.

94 Despite the restricted pattern of expression in adult mice, previous studies have  
95 shown that complete knockout of the Ric-8B gene results in mice that are not  
96 viable and that die early during embryogenesis (between E4 and E8.5) [7]. Here  
97 we investigated the physiological roles of Ric-8B during development using a gene  
98 trapped allele of Ric-8B that shows reduced levels of Ric-8B expression. We found  
99 that the Ric-8B mutant embryos are small, fail to close the neural tube at the  
100 cephalic region and die around E10.5. In the embryo, Ric-8B gene expression is  
101 predominant in the nervous system, more specifically in the neural folds in the  
102 cephalic region and in the ventral region of the neural tube. Increased apoptosis is  
103 observed in the region of the cranial defects in the Ric-8B mutant embryos.  
104 Comparative transcriptome analysis revealed that mTOR signaling is impaired in  
105 the Ric-8B mutant embryos. mTOR is a serine/threonine protein kinase that acts as  
106 the catalytic core of two distinct complexes: mTORC1 and mTORC2. mTORC1  
107 mainly controls cell growth and metabolism, promotes protein synthesis and is the  
108 best characterized complex to date [14,15]. mTORC2, on the other hand, has been  
109 implicated in the regulation of cytoskeletal organization, cell survival and cell  
110 migration [14-19]. Both complexes, mTORC1 and mTORC2, have been linked to  
111 the control of protein synthesis, although the role of mTORC2 is not as clearly  
112 defined as that of mTORC1 [20,21]. We found that mTORC2 activity, but not  
113 mTORC1 activity, is downregulated in the mutant embryo. Similar effects were  
114 observed in HEK293T cells which were knocked down for Ric-8B. Altogether these

115 results show that Ric-8B is essential for embryogenesis. They also show that  
116 depletion of Ric-8B selectively inhibits mTORC2 activity.

117

## 118 **Results**

### 119 **Generation of Ric-8B gene trap mice**

120 In order to generate mice that are deficient for Ric-8B we obtained two  
121 Baygenomics ES cell lines [22], which contain a gene trap vector in the Ric-8B  
122 gene. In the RRH188 cell line, the vector is inserted in the intron between exons 3  
123 and 4, and in the RRA103 cell line the vector is inserted in the intron between  
124 exons 7 and 8 (Fig. 1A). We used these two ES cell lines to produce chimeric  
125 mice, but we could only obtain chimeras from the RRH188 cell line. The insertion  
126 of the gene trap vector leads to the expression of a chimeric mRNA containing  
127 exons 1, 2 and 3 in frame with the  $\beta$ -geo sequence [23]. The resulting Ric-8B  
128 fusion protein is likely to be nonfunctional, because it only contains amino acids 1-  
129 246 from Ric-8B. Chimeric males were crossed with C57BL/6 females and the  
130 agouti-colored offspring were analyzed for transmission of the gene trap vector. As  
131 expected, approximately 50% of these mice were heterozygous for the gene trap  
132 insertion. These mice develop normally with no signs of deficits, when compared to  
133 their wild type siblings.

134

### 135 **Ric-8B mutant mice are embryonic lethal**

136 Heterozygous mice were intercrossed to generate homozygous mutant mice.  
137 Genotyping of the offspring revealed the absence of mice homozygous for the Ric-  
138 8B gene mutation (Table 1). In order to determine the time of embryonic death,  
139 embryos from heterozygous intercrosses were genotyped at different  
140 developmental stages (Fig. 1B, Table 1). We found that homozygous embryos die  
141 around embryonic day 10.5.

142

143 **Table 1. Analysis of offspring and embryos from intercrosses of**  
144 **heterozygous mice.** Genotypes were determined by PCR. The number of  
145 abnormal or dead embryos is shown in parenthesis.  
146

147

| Stage         | Ric-8B <sup>wt/wt</sup> | Ric-8B <sup>wt/bgeo</sup> | Ric-8B <sup>bgeo/bgeo</sup><br>(abnormal) | Total # |
|---------------|-------------------------|---------------------------|-------------------------------------------|---------|
| E7.5          | 11                      | 22                        | 9                                         | 42      |
| E8.5          | 31                      | 56                        | 22(20)                                    | 109     |
| E9.5          | 100                     | 164                       | 97(82)                                    | 361     |
| E10.5         | 8                       | 40                        | 25(23)                                    | 73      |
| E12.5         | 7                       | 12                        | 1(1)                                      | 20      |
| Post<br>natal | 29                      | 53                        | 0                                         | 82      |

148

149

150 As mentioned above, two major transcript forms of Ric-8B are expressed in the  
151 olfactory epithelium, a full-length Ric-8B isoform and Ric-8B $\Delta$ 9, an isoform which  
152 lacks exon 9 (Fig. 1A) [2]. RT-PCR experiments showed that the Ric-8B gene is  
153 expressed in the mouse embryo at early stages of development, and that Ric-8B $\Delta$ 9  
154 is the predominant isoform present in the embryo, while both isoforms are equally  
155 abundant in the olfactory epithelium of adult mice (Fig. 1C, [2]).

156

157 RT-PCR analysis demonstrated that even though detectable, the levels of Ric-8B  
158 mRNA are much lower in the homozygotes (Ric-8B<sup>bgeo/bgeo</sup>) than in the wild type  
159 (Ric-8B<sup>wt/wt</sup>) or heterozygous (Ric-8B<sup>wt/bgeo</sup>) embryos (Fig. 1D and E). Accordingly,  
160 Western blot analysis of extracts prepared from whole embryos demonstrated that  
161 the levels of Ric-8B protein are lower in the homozygous embryos than in wild type  
162 or heterozygous embryos (Fig. 1F). The residual levels present in the homozygous  
163 embryos is likely to result from the gene knockout technology used [23].

164

### 165 **Ric-8B gene expression in the adult mouse**

166 We used the  $\beta$ -geo gene reporter, which is expressed under the control of the Ric-  
167 8B promoter, to monitor the Ric-8B gene expression in the heterozygous (Ric-  
168 8B<sup>wt/bgeo</sup>) mice. Strong blue staining is detected in the olfactory epithelium, but not  
169 in the olfactory bulb, vomeronasal organ or brain (Fig. 2A). Staining can also be  
170 detected in the septal organ of Masera, an isolated small patch of sensory  
171 epithelium located at the ventral base of the nasal septum [24], which is known to  
172 contain olfactory sensory neurons that express  $G\alpha_{olf}$  as well as other canonical  
173 olfactory sensory neuron genes [25]. Although no staining was observed in the  
174 medial view of the brain (Fig. 2A), when the brain is sectioned in a parasagittal  
175 plane, blue staining of the striatum is revealed (Fig. 2B). X-gal staining of sections  
176 cut through the nasal cavity shows that  $\beta$ -galactosidase activity is present  
177 throughout the olfactory epithelium and in the region where the neurons of the  
178 septal organ are located (Fig. 2C, D and F). These results are in agreement with  
179 analysis of Ric-8B gene expression by *in situ* hybridization [2], and indicate that the



180 expression of the  $\beta$ -geo reporter is indistinguishable from that of the endogenous  
181 Ric-8B gene.

182

183 We also examined the Ric-8B gene expression in different tissues of the  
184 heterozygous mice. No staining was observed in any of the several analyzed  
185 tissues (see S1 Fig). Altogether, these results confirm the previous findings that the  
186 expression of the Ric-8B gene is predominantly expressed in a few tissues in the  
187 adult mouse. Lower levels of Ric-8B gene expression are however also detectable  
188 in several other tissues, as shown in publicly available gene expression data, such  
189 as the EMBL-EBI expression Atlas (<https://www.ebi.ac.uk/gxa/home>) and Mouse  
190 ENCODE transcriptome data (<https://www.ncbi.nlm.nih.gov/gene/237422/>).

191

192 **Ric-8B is required for embryonic growth and development of the cranial**  
193 **neural tube**

194 Analysis of the heterozygous embryos showed that expression from the Ric-8B  
195 gene promoter is restricted to the cephalic neural folds and neural tube regions  
196 (Fig. 3B, E and E'). Notably, the levels of  $\beta$ -galactosidase expression are  
197 significantly higher in the Ric-8B<sup>bgeo/bgeo</sup> embryos when compared to heterozygote  
198 embryos (Fig. 3C, F and F'). These results are expected, since the Ric-8B<sup>bgeo/bgeo</sup>  
199 embryos carry two copies of the  $\beta$ -geo reporter gene while the Ric-8B<sup>wt/bgeo</sup>  
200 embryos have only one copy.

201

202 At E8.5-9.5, heterozygous embryos (Ric-8B<sup>wt/bgeo</sup>, Fig. 3B, E and E') are  
203 morphologically similar to that of the wild type embryos (Ric-8B<sup>wt/wt</sup>, Fig. 3A, D and  
204 D'). However, from E8.5, great part of homozygous mutant embryos (Ric-  
205 8B<sup>bgeo/bgeo</sup>; Fig. 3B, C) are slightly smaller and show phenotypic abnormalities in  
206 the prosencephalon. The reduced size of homozygote embryos is emphasized in  
207 later stages (Fig. 3J), and the failure in the closure of the cephalic neural tube  
208 becomes evident at E9.5 (Fig. 3 F, F'). In order to better visualize the fusion of the  
209 cephalic neural folds we performed scanning electron microscopy. Wild type as  
210 well as heterozygous E9.5 embryos show normally closed neural tube (Fig. 3G and  
211 G', 3H and H'). The Ric-8B<sup>bgeo/bgeo</sup> embryos, however, do not display fused midline  
212 hemispheres (Fig. 3I and I'). These embryos are not able to close the neural tube  
213 and usually display open rhombencephalic, mesencephalic and prosencephalic  
214 vesicles (Fig. 3I and I'). It is important to note that this 'open brain' phenotype is  
215 highly penetrant, shown by ~86% of the analyzed embryos.

216

217 Expression of the Ric-8B gene along the embryonic anterior-posterior axis was  
218 analyzed in transverse sections of X-gal stained embryos. Staining in Ric-8B<sup>wt/bgeo</sup>  
219 embryos is highly restricted to the notochord, dorsal neural tube in the region of the  
220 presumptive brain, and to the ventral region of the neural tube, including the floor  
221 plate of the spinal cord (Fig. 4 A-B and E-H). The same regions are strongly  
222 stained in Ric-8B<sup>bgeo/bgeo</sup> embryos, however, less intense staining is also detected  
223 all over the neural tube and regions of the adjacent mesoderm (Fig. 4 C and D, I-  
224 L). As mentioned above, while the neural tube is normally closed in the Ric-

225 8B<sup>wt/bgeo</sup> embryos, it fails to close in the brain region in Ric-8B<sup>bgeo/bgeo</sup> embryos  
226 (arrows in Fig. 4G and K).  
227 Ric-8B expression pattern in the notochord (Fig. 4B) and the floor plate (Fig. 4H,  
228 S4A Fig) is highly reminiscent of the sonic hedgehog (*Shh*) expression at the same  
229 embryonic stages [26]. However, we found that Shh signaling is not grossly altered  
230 in the homozygous Ric-8B mutant embryos (S4B and S4C Figs). *In situ*  
231 hybridization on sections of an E10.5 wild type embryo shows that  $G\alpha_{olf}$  is not co-  
232 expressed with Ric-8B in the floor plate, while  $G\alpha_s$  is highly expressed all over the  
233 neural tube (S5A Fig). In addition, quantitative PCR experiments show that  
234 expression of  $G\alpha_{olf}$  is not detected in E7.5 - E10.5 in whole embryos (data not  
235 shown). These results suggest that  $G\alpha_s$  may be the target for Ric-8B in the mouse  
236 embryo, instead of  $G\alpha_{olf}$ .

237

238 The expression of the  $\beta$ -geo reporter gene in the neural folds and roof plate at  
239 E8.5-E9.5 (Fig. 4) strongly suggest that the deficiency of Ric-8B gene expression is  
240 leading to the failure of neural tube closure. Previous studies have shown that this  
241 phenotype can result from a variety of embryonic disturbances [27,28], such as  
242 abnormalities in the contraction of apical actin microfilaments within neuroepithelial  
243 cells [27], or reduced/ increased apoptosis of neuroepithelial cells [27]. We  
244 analyzed the distribution of polymerized actin in the neural tubes of wild type and  
245 mutant E9.5 embryos, however, no significant differences between wild type and  
246 mutant embryos were observed (Fig. 5A). Disturbances in apoptosis were  
247 analyzed by immunostaining for activated caspase-3 in E9.5 embryo sections. We

248 found an increased number of apoptotic cells in the neural tube of Ric-8B<sup>bgeo/bgeo</sup>  
249 embryos, as well as in the cranial mesenchyme (Fig. 5B).

250

251 We also tested the impact of Ric-8B gene depletion on apoptosis *in vitro*, by using  
252 mouse embryonic fibroblasts (MEFs) generated from the Ric-8B mutant embryos.  
253 Even though Ric-8B is predominantly expressed in the nervous system (as shown  
254 in Figs. 3 and 4), MEFs prepared from wild type embryos also express Ric-8B,  
255 although at much lower levels when compared to whole wild type embryos (data  
256 not shown). Noticeably, MEF preparations from Ric-8B<sup>bgeo/bgeo</sup> embryos died within  
257 few days in culture. We found that, while the number of dividing cells seems to be  
258 unaltered, as revealed by bromodeoxyuridine (BrdU) staining, the number of cells  
259 immuno stained for activated caspase-3 is increased in MEFs generated from Ric-  
260 8B<sup>bgeo/bgeo</sup> embryos, when compared to MEFs generated from Ric-8B<sup>wt/wt</sup> embryos  
261 (Fig. 5C). These results indicate that depletion of Ric-8B leads to increased  
262 apoptosis.

263

### 264 **Cell signaling pathways altered in the Ric-8B mutant embryos**

265 To gain insight into the molecular mechanisms impacted by the mutation in the Ric-  
266 8B gene, we sequenced and compared the transcriptomes of mutant and wild type  
267 embryos. The 947 differentially expressed genes (FDR < 0.05) (S1 and S2 Tables)  
268 were analyzed with Ingenuity Pathway Analysis (IPA) to identify the  
269 overrepresented biological pathways among all differentially regulated genes.

270 Unexpectedly, among the top ten canonical pathways that were identified by IPA,  
271 the EIF2 signaling, Regulation of eIF4 and p70S6K signaling and mTOR  
272 (mechanistic target of rapamycin) signaling pathways were the most significant  
273 (Fig. 6A). The mTOR pathway regulates protein synthesis, in addition to a number  
274 of other important physiological processes [14,15,29].

275 In addition, consistent with the role played by Ric-8B in G protein function, different  
276 pathways involving GPCRs and G protein signaling such as G Beta Gamma  
277 signaling, G $\alpha$ 12/13 signaling,  $\alpha$ -Adrenergic signaling and Phospholipase C  
278 signaling are also significantly altered in the mutant embryo (S5B Fig).

279

## 280 **mTOR signaling in Ric-8B mutant embryos**

281 We next assessed the activity of mTOR in E9.5 embryos by the phosphorylation  
282 levels of key downstream targets of both complexes. Akt, a prosurvival kinase, is  
283 fully activated through the phosphorylation of Thr308 by phosphoinositide-  
284 dependent kinase 1 (PDK1) and of Ser 473 by mTORC2 [30-33]. We found that  
285 while phosphorylation of Akt at Thr 308 was not altered in Ric-8B<sup>bgeo/bgeo</sup> whole  
286 embryo lysates, phosphorylation of Akt at Ser 473 catalyzed by mTORC2 was  
287 significantly reduced (Fig. 6B-D). The levels of phosphorylation of ribosomal  
288 protein S6, a downstream target for mTORC1, were not significantly altered in Ric-  
289 8B<sup>bgeo/bgeo</sup> embryos, suggesting that mTORC1 activity is intact (Fig. 6E). These  
290 results indicate that only the activity of mTORC2 is impaired in Ric-8B<sup>bgeo/bgeo</sup>  
291 embryos.

292 Inhibition of mTORC2 function leads to decreased phosphorylation of the FoxO1  
293 and FoxO3a transcription factors, leading to their translocation to the nucleus and  
294 subsequent transcription of pro-apoptotic genes [34]. Consistent with this,  
295 transcription of the *FoxO3* gene, which is a target for FoxO1/FoxO3 transcription  
296 factors [35], is upregulated in the Ric-8B<sup>bgeo/bgeo</sup> embryos (log fold change = 0.71;  
297 FDR= 0.009; S2 Table). As mentioned above, mTORC2 is also involved in the  
298 organization of the cytoskeleton, through the regulation of RhoGTPases and PKC $\alpha$   
299 [15]. Notably, signaling pathways involved in actin regulation by Rho GTPases  
300 were also identified by the IPA analysis (Fig. 6A). Altogether these results indicate  
301 that Ric-8B is required for normal mTORC2 activity during mouse embryogenesis.

302

### 303 **mTOR signaling in Ric-8B knockdown cell lines**

304 We next generated conditional shRNA-mediated Ric-8B knockdown HEK293T cell  
305 lines and examined mTOR signaling in these cells. shRNAs targeting three  
306 different regions of the Ric-8B gene were used (Fig. 7A). Western blot analysis  
307 showed that expression of the Ric-8B protein was reduced in all the three  
308 generated cell lines when compared to control cells, with the shRNA17 cell line  
309 showing the lowest levels (S6 Fig). Knockdown and control cells were starved for 4  
310 hours and then the mTOR signaling pathway was stimulated through addition of  
311 10% FBS for different times before cell lysis. The phosphorylation levels of Akt at  
312 Ser 473 and S6 were compared in protein extracts prepared from the Ric-8B  
313 shRNA17 cells and control cells. We found that the levels of phosphorylation of Akt

314 at Ser 473 are markedly reduced in the knockdown cells (Fig. 7B). As shown for  
315 the Ric-8B mutant embryos, no striking differences were observed in the S6  
316 phosphorylation levels (Fig. 7B). These results show that not only in the mouse  
317 embryo, but also in the HEK293T cells, Ric-8B is required for mTORC2, but not for  
318 mTORC1 activity.

319 Finally, because previous work showed that Ric-8B stabilizes expression of G $\alpha$ s/olf  
320 protein subunits in different cell types [7,8,11], we asked whether the G $\alpha$ s protein  
321 is stably expressed in our Ric-8B knockdown cells. Experiments using protein  
322 extracts prepared from these cells showed that the levels of the G $\alpha$ s protein are  
323 reduced when compared to the levels found in control cells (Fig. 7C).

324

325

## 326 **Discussion**

327

328 In this study, we show that the Ric-8B hypomorph embryos fail to close the neural  
329 tube at the cephalic region. Our results show that increased apoptosis occurs in  
330 the region of the neural tube defect in Ric-8B mutant mice. Expansion of the cranial  
331 mesenchyme is required for the elevation of the cranial neural folds, and excessive  
332 apoptosis in the mesenchyme would preclude this expansion. Therefore, excessive  
333 apoptosis must cause or contribute to the cranial neural tube defect observed in  
334 the Ric-8B mutant mice. The finding that MEFs generated from the mutant Ric-8B  
335 embryos also show an increased frequency of apoptotic cells, further supports a

336 role for Ric-8B in apoptosis. We found that mTORC2 activity, but not mTORC1  
337 activity, is reduced in the Ric-8B mutant embryos when compared to wild type  
338 embryos. Since mTORC2 phosphorylation of Akt at Ser 473 promotes cell survival  
339 versus apoptosis [36], decreased activity of mTORC2 could therefore lead to  
340 increased apoptosis in the Ric-8B mutant embryo. Further experiments would  
341 however be required to determine whether the observed increase in apoptosis is a  
342 direct consequence of mTORC2 dysregulation in this case.

343

344 Open cephalic tube phenotypes are also seen in embryos that are mutant for a  
345 series of different genes, indicating that varied processes are required for  
346 successful closure of the neural tube [27,28]. Notably, embryos deficient for the G  
347 protein G $\beta$ 1 subunit also exhibit similar defects [37], supporting the involvement of  
348 G protein mechanisms in these processes. Mutations that lead to the upregulation  
349 of the Shh pathway also may result in open cranial tube phenotypes [38]. For  
350 example, complete loss of the ciliary Gpr161 leads to increased Shh signaling and  
351 lethality by E10.5 with open forebrain and midbrain regions [39]. Loss of G $\alpha$ s leads  
352 to activation of Shh signaling and embryos die at E9.5 with open neural tube and  
353 cardiac defects [40]. We found however, that Shh signaling is not severely altered  
354 in the Ric-8B homozygous mutants. Still, since these Ric-8B mutants are not null,  
355 we cannot exclude the possibility that the residual function of Ric-8B may attenuate  
356 the actual Ric-8B null phenotype. Accordingly, knockout of the Ric-8B gene results  
357 in embryonic lethality at earlier stages (between E4 and E8.5), indicating that in  
358 this case the mice present earlier phenotypes that result in earlier death [7].



359  
360 Several mutant mice have already been generated to study the role played by the  
361 mTOR complexes *in vivo*. Interestingly, embryos that are ablated for *Rictor*, a  
362 specific component present in mTORC2 that is required for its function, are smaller  
363 than their littermates [32,33], a phenotype that is similar to the one shown by Ric-  
364 8B mutant embryos (Fig. 4J). Even though *Rictor* null embryos do not show open  
365 cranial neural tubes, mice knocked out for *mLST8* fail to develop the cephalic  
366 region [32]. mLST8 contains seven WD-40 repeats that are common to G $\beta$   
367 subunits, and is therefore also named G $\beta$ L (G protein  $\beta$  subunit like protein) [41].  
368 mLST8 is present in both mTORC1 and mTORC2 complexes, but required only for  
369 mTORC2 function during development. *Rictor* and *mLST8* deficient embryos are  
370 phenotypically similar, they die around E10.5 and show reduced phosphorylation of  
371 Akt at Ser473 [32,33]. In addition, in these mutant embryos, phosphorylation of Akt  
372 at Thr 308 is not altered when compared to the wild type embryos, as also  
373 observed for the Ric-8B mutant embryo [32,33].

374 The tuberous sclerosis complex (composed of Tsc1 and Tsc2) is a critical negative  
375 regulator of mTORC1 and its deficiency promotes constitutive activation of  
376 mTORC1, as expected, but also inhibition of mTORC2 [42-44]. This involves a  
377 negative feedback catalyzed by mTORC1 downstream targets S6K and GRB10 on  
378 IRS-PI3K function upstream to mTORC2 [45,46]. Embryos with mutations in the  
379 *Tsc1* and *Tsc2* genes are smaller compared to age-matched controls, and also  
380 show exencephaly. These phenotypes are of less magnitude but similar to those  
381 seen in the Ric-8B mutant embryos [47-50], suggesting that they may be mediated

382 by mTORC2 inhibition rather than constitutive mTORC1 activation. Altogether  
383 these findings suggest that Ric-8B mutant embryonic phenotypes may be, at least  
384 in part, consequence of impaired mTORC2 signaling.

385 Upstream regulators of mTORC2 are still largely unknown [15,18,29,51]. Our  
386 results show that Ric-8B is required for mTORC2 activity, both, in the developing  
387 embryo and in HEK293T cells. There is evidence indicating that GPCR signaling  
388 can activate the mTOR signaling pathway, but how the signal is relayed within the  
389 cell to activate mTORC2 remains unknown. Growth factors activate mTORC2  
390 through PI3K-dependent mTORC2-ribosome association, through a mechanism  
391 that is still not completely understood [20,21]. GPCR-promoted activation of PI3K is  
392 thought to be mediated by G $\beta\gamma$  subunits [52-54]. A study showed that gallein, a  
393 pharmacological inhibitor of G $\beta\gamma$ , attenuated CXCR4 chemokine receptor promoted  
394 phosphorylation of Akt Ser 473, indicating that G $\beta\gamma$  is required for Akt signaling  
395 through this GPCR [55]. A different study showed that G $\beta\gamma$  directly interacts with  
396 both, mTORC1 and mTORC2 complexes, raising the possibility that they can  
397 activate mTOR independently of PI3K [56].

398 Recent studies have found that adrenergic signaling may induce mTORC2  
399 activation [57-59]. One of these studies showed that Akt (Ser473) phosphorylation  
400 can be induced in brown adipocytes upon  $\beta$ -adrenergic stimulation in a PI3K-  
401 dependent and mTORC1-independent fashion, and via cAMP [57]. These results  
402 indicate that GPCR signaling through Gs can activate mTORC2 in some cell types.  
403 Even though the precise mechanisms through which Ric-8B is involved in  
404 mTORC2 signaling require further investigation, our results suggest that reduced

405 phosphorylation of Akt at Ser473 in the Ric-8B knockdown cells could be due to  
406 the lower levels of  $G\alpha_s$  expressed in these cells. Noteworthy, however, we found  
407 that the Ric-8B $\Delta$ 9 isoform, which does not interact with  $G\alpha$  subunits but does  
408 interact with  $G\beta\gamma$  subunits, is the predominant form of Ric-8B expressed in the  
409 embryo (Fig. 1C). It is therefore also possible that  $G\beta\gamma$  signaling is altered, leading  
410 to a defective mTORC2 signaling (Fig. 7D). Finally, our results do not exclude the  
411 possibility that Ric-8B and/or Ric-8B $\Delta$ 9 could have additional targets that are  
412 unrelated to G proteins and are yet to be identified.

413 In summary, our results show that Ric-8B is essential for mouse embryogenesis  
414 and is required for the normal development of the nervous system. In addition, they  
415 show that deletion of Ric-8B leads to impaired mTORC2 function, and provide  
416 evidence for a connection between GPCR/G protein signaling and mTORC2  
417 activity. Extensive studies of the Ric-8B mutants should contribute to unravel the  
418 mechanisms that regulate mTORC2 activity, which are still little understood.

419

420

421

422

423

## 424 **Materials and Methods**

### 425 **Animal procedures**

426 All procedures undertaken in this study were approved by the University of São  
427 Paulo Chemistry Institute's Animal Care and Use Committee, under the protocol  
428 #19/2013 and #60/2017.

429

### 430 **Gene trap mice**

431 The Baygenomics ES cell lines RRH188 and RRA103 derived from the  
432 129P2Ola/HSD strain were used. The insertion of the gene trap vectors (pGT01xf  
433 and pGT11xf, respectively) in the Ric-8B gene was confirmed by RT-PCR, using  
434 the vector primer  $\beta$ -geo R together with primer RRH188F in exon 3 or primer  
435 RRA103F in exon 7, to detect the corresponding chimeric mRNAs. The cells were  
436 injected into C57BL/6 strain blastocysts at the Mutant Mouse Regional Resource  
437 Center (MMRRC) at the University of California, Davis (<http://www.mmrrc.org>) to  
438 produce chimeric mice. Chimeric male mice showing high percent chimerism were  
439 crossed to C57BL/6 females and the resulting agouti offspring was genotyped by  
440 PCR on ear genomic DNA using primers that recognize the gene trap vector  
441 (vector F2, and  $\beta$ -geo R). Primer sequences are shown in S3 Fig. The precise site  
442 of vector insertion in the third intron of Ric-8B was determined as described in S2  
443 Fig. Heterozygous mice were intercrossed and the resulting mice were genotyped  
444 by a multiplex PCR using three primers: the forward primer 188intronF2 in intron 3  
445 and two reverse primers, the VectorR2 primer in the gene trap vector for the Ric-  
446 8B KO allele (312 bp PCR product), and the 188intronR2 primer in intron 3 for the  
447 WT allele (582 bp PCR product). PCR reactions started with a denaturation step of

448 95°C for 3 minutes, followed by 35 cycles of 95°C for 45 s, 68°C for 45 s and 72°C  
449 for 1 minute.

#### 450 **X-gal staining of tissues and embryos**

451 X-gal staining was performed as described in [60]. Briefly, for whole mounts,  
452 tissues were dissected and incubated on ice for 30 minutes with 100 mM  
453 phosphate buffer (pH 7.4), 4% PFA, 2 mM MgSO<sub>4</sub>, 5 mM EGTA, washed once with  
454 100 mM phosphate buffer (pH7.4), 2 mM MgCl<sub>2</sub>, 5mM EGTA at room temperature  
455 and further incubated for 30 minutes with the same buffer. Tissues were then  
456 washed twice for 5 minutes at room temperature with 100 mM phosphate buffer  
457 (pH 7.4), 2 mM MgCl<sub>2</sub>, 0.01% sodium deoxycholate, 0.02% NP-40 and incubated  
458 for 3 hours (olfactory epithelium), 9 hours (striatum) or overnight (embryos) in the  
459 dark at 37°C with 100 mM phosphate buffer (pH 7.4), 2 mM MgCl<sub>2</sub>, 0.01% sodium  
460 deoxycholate, 0.02% NP-40, 5 mM potassium ferricyanide, 5 mM potassium  
461 ferrocyanide, 1mg/ml X-gal. For sections, whole mount embryos stained with X-gal  
462 were frozen to -20°C in OCT (Sakura TissueTek) and immediately sectioned using  
463 a cryostat. It is important to note that we also detected endogenous β-  
464 galactosidase activity in the olfactory epithelium of wild type mice, as previously  
465 described [61], however, it was observed only after one overnight incubation with  
466 X-gal, while staining of the olfactory epithelium from heterozygous RRH188 mice is  
467 visible after 3 hours.

468

#### 469 ***In situ* hybridization**

470 Dissected embryos were fixed in 4% PFA for 16 hours at 4°C. Cryopreservation  
471 was performed in 30% sucrose, 50% OCT for 2 hours at 4°C. Then, whole mount  
472 embryos were frozen in OCT and sectioned using a cryostat. For *in situ*  
473 hybridization experiments, sections were fixed in 4% PFA for 10 minutes, washed  
474 twice in PBS for 5 minutes and digested with Proteinase K 10 µg/ml for 8 minutes.  
475 Then, sections were fixed in 4% PFA for 15 minutes and washed twice in PBS for 5  
476 minutes. The following steps were performed as described in [2].

477

#### 478 **Western blot**

479 Whole E9.5 embryos or HEK293T cells were lysed with cold RIPA buffer (100 mM  
480 Tris pH 7,4; 0,25% sodium deoxycholate; 150 mM NaCl, 1 mM EDTA and 1%  
481 NP40 v/v containing 1 X phosphatase inhibitor phoSTOP (Sigma #4906845001)  
482 and 1 X protease inhibitor cocktail, Sigma) and 10% SDS-PAGE was used to  
483 fractionate proteins. Western blotting was performed by using anti-Gli3  
484 (Proteintech #19949-1-AP), anti-Ric-8B (Atlas #HPA042746), anti-phospho S6  
485 (Cell Signaling #5364), anti S6 (Cell Signaling #2217), anti-phospho-Akt (Ser 473)  
486 (Cell Signaling #4060), anti-phospho-Akt (Thr 308) (Cell Signaling#2965), anti-Akt  
487 1 (Millipore #06-885), anti-Akt (pan) (Cell Signaling #2920), anti-G $\alpha$ s (Santa Cruz  
488 #55545), anti- $\alpha$ -tubulin (Sigma #T5168) or anti- $\beta$ -actin (Santa Cruz #47778)  
489 antibodies. Immunoreactivity was detected by incubating the membranes with  
490 specific HRP-conjugated secondary antibodies (Cell Signaling), and visualized  
491 using a chemiluminescence system (Amersham ECL Prime, GE Healthcare  
492 #RPN2133). For the semi-quantitative analysis of phospho-AKT (Ser 473) and

493 phosphoS6, the blots were scanned using a gel image capture system to quantify  
494 differences via densitometry (Alliance 2.7 system, Alliance 1D capture software,  
495 and UVIBand 12.14 analysis software; UVITEC, Cambridge, UK). Values are  
496 expressed as percentages of control after normalization with  $\beta$ -actin. Data are  
497 expressed as mean  $\pm$  standard error of the mean (SEM). Statistical analysis was  
498 performed by one-way ANOVA followed by Tukey's post hoc test.

499

#### 500 **RT-PCR**

501 RNA was purified from mouse embryos and cDNA synthesis was performed as  
502 previously described [2]. The pair of primers Ric-8BFexon3 and Ric-8BRexon5, or  
503 RicRTF and RicRTR (see S3 Fig) were used to amplify different regions of the Ric-  
504 8B cDNA. The PCR reaction was carried out for 28 cycles, and the PCR products  
505 were analyzed in 1% agarose gels.

506

#### 507 **Real-time PCR**

508 Ric-8B gene expression was quantified by real-time PCR using the ABI (USA)  
509 7300 Real-Time PCR system, and cDNAs were prepared from E10.5 embryos as  
510 previously described [2,62]. Primer sequences were Ric-8BF *forward* 5'-  
511 AGCTGGTTCGTCTCATGACAC-3' and Ric-8BR *reverse* 5'-  
512 CAGCGTTCCCATAGCCAGTG-3'. All reactions were performed by using a  
513 standard real time PCR protocol (1 cycle of 95°C for 10 min, 40 cycles of 95°C for  
514 15 s, and 60°C for 1 min). Data was normalized by using  $\beta$ -actin as reference.  
515 Relative gene expression between different embryos was then calculated as

516  $2^{-\Delta\Delta Ct}$ , using the sample of the wild type embryo as calibrator, according to Livak  
517 and Schmittgen [63]. Each reaction was performed in triplicate and the standard  
518 deviation was inferior to 0.3.

519

## 520 **Scanning electron microscopy**

521 Embryos were dissected in cold PBS and fixed overnight at 4°C in PBS containing  
522 4% paraformaldehyde, 2.5% glutaraldehyde, 1% tannic acid and 5 mM calcium  
523 chloride. The embryos were dehydrated through a graded ethanol series and  
524 critical point-dried (Balzers CPD 050). After gold-sputtering (20 nm-gold layer)  
525 (BalTec CSC 020), the embryos were observed in a Jeol 5310 operating at 15 kV.  
526 Digital images were acquired at the resolution of 1024×770 pixels using SEMafore  
527 software.

528

## 529 **Immunostaining**

530 Embryos were fixed overnight at 4°C in 4% PFA, followed by cryoprotection in 30%  
531 sucrose, and embedding in OCT (Sakura TissueTek). OCT blocks were sectioned  
532 at 14-16 µm using a cryostat. Sections were blocked in 10% FBS, 0.2% Triton-X  
533 for 1 hour, followed by incubation with anti-cleaved caspase-3 (Cell Signaling  
534 #9661, 1:250) diluted in 1% FBS, 0.2% Triton-X. After incubation, sections were  
535 washed with PBS and incubated with Alexa488-conjugated donkey anti-rabbit IgG  
536 (Life Technologies #A-21206, 1:300) and Rhodamine Phalloidin diluted in 1% FBS,  
537 0.2% Triton-X. Nuclei were stained with DAPI (SIGMA, 0.5 µg/ml).

538

## 539 **MEFs**



540 MEFs were isolated from E9.5 embryos of each genotype and cultured in DMEM  
541 with 10% FBS. Cells were pulsed for 1 hour with 10 $\mu$ M bromodeoxyuridine (BrdU)  
542 and fixed in 4% PFA for 20 minutes at room temperature. After fixation, cells were  
543 double stained with anti-BrdU (Santa Cruz sc-32323, 1:400) and anti-cleaved  
544 caspase-3 primary antibodies (Cell Signaling #9661, 1:250). Nuclei were stained  
545 with DAPI (SIGMA, 0.5  $\mu$ g/ml). Photographs were taken using a Nikon TE300  
546 microscope.

547

### 548 **RNA sequencing (RNA-Seq) and signaling pathway analysis**

549 Ribosomal RNA was depleted from total RNA prepared from E10.5 mouse  
550 embryos using the RiboMinus Eukaryote Kit for RNA-Seq (Invitrogen). RNA-Seq  
551 libraries were prepared using SOLiD Total RNA-Seq Kit, according to the  
552 manufacturers' recommendations, and were sequenced on the SOLiD sequencing  
553 platform (Life technologies, Carlsbad, CA). Sequences were then aligned to the  
554 mouse genome (version GRCm38/mm10) using Tophat [64] with default  
555 parameters and gene annotations provided by Ensembl (version 71, [65]).  
556 Alignments were filtered with SAMtools [66]. The uniquely mapped reads with  
557 minimum mapping quality 20 were used to calculate gene expression, which was  
558 generated using Cufflinks [67]. Pathway analysis was performed using Ingenuity  
559 Pathway Analysis (IPA, QIAGEN, Redwood City, [www.qiagen.com/ingenuity](http://www.qiagen.com/ingenuity)). The  
560 overrepresented pathways, shown in Fig. 6A, met the IPA cut-off threshold for  
561 significance (p-value < 0.05). Analysis was run by using all default settings for the  
562 selection of dataset, no fold-change cut-off, FDR <0.05 and P-value < 0.05.

563

## 564 **Knock down experiments**

565 To knockdown Ric-8B expression in HEK293T cells we used the SMARTvector

566 Inducible Human RIC8B shRNA (V3SH11252-227737126

567 GGATGTTTCGATGGGCTCG; V3SH11252-229071976

568 TAAACAATGACGAAGGACA; V3SH11252-229376731

569 CTGAGTACCAATTATCTCC (Dharmacon). For the experiments shown in Figure

570 9B cells were plated in Dulbecco's Modified Eagle's Medium (DMEM)

571 supplemented with 10% of fetal bovine serum (FBS) and doxycycline 1,0 µg/mL.

572 Three days later, medium was removed and cells were washed twice with PBS 1x.

573 Cells were starved in DMEM without FBS for 4 hours and then stimulated with

574 DMEM 10% FBS for different times.

575

## 576 **Acknowledgements**

577 We are very grateful to Chao Yun Irene Yan, Deborah Schechtman and Hiroaki

578 Matsunami for helpful comments and suggestions. We also thank Sylvania Neves

579 and Renata Spaluto for assistance with animal care and Erica Bandeira for

580 technical assistance. This work was supported by grants from Fundação de

581 Amparo à Pesquisa do Estado de São Paulo (FAPESP#16/24471-0; #

582 2014/15495-8), CNPq and CAPES.

583

## 584 **References**

- 585 1. Tall GG, Krumins AM, Gilman AG (2003) Mammalian Ric-8A (synembryn) is a  
586 heterotrimeric Gα protein guanine nucleotide exchange factor. *J Biol Chem*  
587 278: 8356-8362.
- 588 2. Von Dannecker L, Mercadante A, Malnic B (2005) Ric-8B, an olfactory putative  
589 GTP exchange factor, amplifies signal transduction through the olfactory-  
590 specific G-protein G<sub>olf</sub>. *J Neurosci* 25: 3793-3800.
- 591 3. Chan P, Gabay M, Wright FA, Tall GG (2011) Ric-8B is a GTP-dependent G  
592 protein α subunit guanine nucleotide exchange factor. *J Biol Chem* 286:  
593 19932-19942.
- 594 4. Jones DT, Reed RR (1989) Golf: an olfactory neuron-specific G-protein involved  
595 in odorant signal transduction. *Science* 244: 790-795.
- 596 5. Belluscio L, Gold GH, Nemes A, Axel R (1998) Mice deficient in G(olf) are  
597 anosmic. *Neuron* 20: 69-81.
- 598 6. Zhuang X, Belluscio L, Hen R (2000) Golfα mediates dopamine D1 receptor  
599 signaling. *J Neurosci* 20: RC91.
- 600 7. Gabay M, Pinter ME, Wright FA, Chan P, Murphy AJ, et al. (2011) Ric-8 proteins  
601 are molecular chaperones that direct nascent G protein α subunit  
602 membrane association. *Sci Signal* 4: ra79.
- 603 8. Nagai Y, Nishimura A, Tago K, Mizuno N, Itoh H (2010) Ric-8B stabilizes the  
604 α subunit of stimulatory G protein by inhibiting its ubiquitination. *J Biol*  
605 *Chem* 285: 11114-11120.
- 606 9. Zhuang H, Matsunami H (2007) Synergism of accessory factors in functional  
607 expression of mammalian odorant receptors. *J Biol Chem* 282: 15284-  
608 15293.
- 609 10. Kerr D, Von Dannecker L, Davalos M, Michaloski J, Malnic B (2008) Ric-8B  
610 interacts with G<sub>olf</sub> and G<sub>g13</sub> and co-localizes with G<sub>olf</sub>, G<sub>b1</sub> and G<sub>g13</sub> in  
611 the cilia of olfactory sensory neurons. *Mol Cell Neurosci* 38: 341-348.
- 612 11. Von Dannecker L, Mercadante A, Malnic B (2006) Ric-8B promotes functional  
613 expression of odorant receptors. *Proc Natl Acad Sci USA* 103: 9310-9314.
- 614 12. Masuho I, Ostrovskaya O, Kramer GM, Jones CD, Xie K, et al. (2015) Distinct  
615 profiles of functional discrimination among G proteins determine the actions  
616 of G protein-coupled receptors. *Sci Signal* 8: ra123.
- 617 13. Machado CF, Nagai MH, Lyra CS, Reis-Silva TM, Xavier AM, et al. (2017)  
618 Conditional Deletion of Ric-8b in Olfactory Sensory Neurons Leads to  
619 Olfactory Impairment. *J Neurosci* 37: 12202-12213.
- 620 14. Hung CM, Garcia-Haro L, Sparks CA, Guertin DA (2012) mTOR-dependent cell  
621 survival mechanisms. *Cold Spring Harb Perspect Biol* 4.
- 622 15. Laplante M, Sabatini DM (2012) mTOR signaling in growth control and disease.  
623 *Cell* 149: 274-293.
- 624 16. Sarbassov DD, Ali SM, Kim DH, Guertin DA, Latek RR, et al. (2004) Rictor, a  
625 novel binding partner of mTOR, defines a rapamycin-insensitive and raptor-  
626 independent pathway that regulates the cytoskeleton. *Curr Biol* 14: 1296-  
627 1302.
- 628 17. Jacinto E, Loewith R, Schmidt A, Lin S, Rugg MA, et al. (2004) Mammalian  
629 TOR complex 2 controls the actin cytoskeleton and is rapamycin insensitive.  
630 *Nat Cell Biol* 6: 1122-1128.

- 631 18. Cybulski N, Hall MN (2009) TOR complex 2: a signaling pathway of its own.  
632 Trends Biochem Sci 34: 620-627.
- 633 19. Xie J, Wang X, Proud CG (2018) Who does TORC2 talk to? Biochem J 475:  
634 1721-1738.
- 635 20. Oh WJ, Wu CC, Kim SJ, Facchinetti V, Julien LA, et al. (2010) mTORC2 can  
636 associate with ribosomes to promote cotranslational phosphorylation and  
637 stability of nascent Akt polypeptide. EMBO J 29: 3939-3951.
- 638 21. Zinzalla V, Stracka D, Oppliger W, Hall MN (2011) Activation of mTORC2 by  
639 association with the ribosome. Cell 144: 757-768.
- 640 22. Stryke D, Kawamoto M, Huang CC, Johns SJ, King LA, et al. (2003)  
641 BayGenomics: a resource of insertional mutations in mouse embryonic stem  
642 cells. Nucleic Acids Res 31: 278-281.
- 643 23. Stanford WL, Cohn JB, Cordes SP (2001) Gene-trap mutagenesis: past,  
644 present and beyond. Nat Rev Genet 2: 756-768.
- 645 24. Munger SD, Leinders-Zufall T, Zufall F (2009) Subsystem organization of the  
646 mammalian sense of smell. Annu Rev Physiol 71: 115-140.
- 647 25. Ma M, Grosmaître X, Iwema CL, Baker H, Greer CA, et al. (2003) Olfactory  
648 signal transduction in the mouse septal organ. J Neurosci 23: 317-324.
- 649 26. Roelink H, Porter JA, Chiang C, Tanabe Y, Chang DT, et al. (1995) Floor plate  
650 and motor neuron induction by different concentrations of the amino-  
651 terminal cleavage product of sonic hedgehog autoproteolysis. Cell 81: 445-  
652 455.
- 653 27. Copp AJ (2005) Neurulation in the cranial region--normal and abnormal. J Anat  
654 207: 623-635.
- 655 28. Copp AJ, Greene ND, Murdoch JN (2003) The genetic basis of mammalian  
656 neurulation. Nat Rev Genet 4: 784-793.
- 657 29. Saxton RA, Sabatini DM (2017) mTOR Signaling in Growth, Metabolism, and  
658 Disease. Cell 168: 960-976.
- 659 30. Hresko RC, Mueckler M (2005) mTOR.RICTOR is the Ser473 kinase for  
660 Akt/protein kinase B in 3T3-L1 adipocytes. J Biol Chem 280: 40406-40416.
- 661 31. Sarbassov DD, Guertin DA, Ali SM, Sabatini DM (2005) Phosphorylation and  
662 regulation of Akt/PKB by the rictor-mTOR complex. Science 307: 1098-  
663 1101.
- 664 32. Guertin DA, Stevens DM, Thoreen CC, Burds AA, Kalaany NY, et al. (2006)  
665 Ablation in mice of the mTORC components raptor, rictor, or mLST8 reveals  
666 that mTORC2 is required for signaling to Akt-FOXO and PKC $\alpha$ , but not  
667 S6K1. Dev Cell 11: 859-871.
- 668 33. Shiota C, Woo JT, Lindner J, Shelton KD, Magnuson MA (2006) Multiallelic  
669 disruption of the rictor gene in mice reveals that mTOR complex 2 is  
670 essential for fetal growth and viability. Dev Cell 11: 583-589.
- 671 34. Calnan DR, Brunet A (2008) The FoxO code. Oncogene 27: 2276-2288.
- 672 35. van der Vos KE, Coffey PJ (2011) The extending network of FOXO  
673 transcriptional target genes. Antioxid Redox Signal 14: 579-592.
- 674 36. Jacinto E, Facchinetti V, Liu D, Soto N, Wei S, et al. (2006) SIN1/MIP1  
675 maintains rictor-mTOR complex integrity and regulates Akt phosphorylation  
676 and substrate specificity. Cell 127: 125-137.

- 677 37. Okae H, Iwakura Y (2010) Neural tube defects and impaired neural progenitor  
678 cell proliferation in Gbeta1-deficient mice. *Dev Dyn* 239: 1089-1101.
- 679 38. Murdoch JN, Copp AJ (2010) The relationship between sonic Hedgehog  
680 signaling, cilia, and neural tube defects. *Birth Defects Res A Clin Mol Teratol*  
681 88: 633-652.
- 682 39. Mukhopadhyay S, Wen X, Ratti N, Loktev A, Rangell L, et al. (2013) The ciliary  
683 G-protein-coupled receptor Gpr161 negatively regulates the Sonic  
684 hedgehog pathway via cAMP signaling. *Cell* 152: 210-223.
- 685 40. Regard JB, Malhotra D, Gvozdenovic-Jeremic J, Josey M, Chen M, et al.  
686 (2013) Activation of Hedgehog signaling by loss of GNAS causes  
687 heterotopic ossification. *Nat Med* 19: 1505-1512.
- 688 41. Rodgers BD, Levine MA, Bernier M, Montrose-Rafizadeh C (2001) Insulin  
689 regulation of a novel WD-40 repeat protein in adipocytes. *J Endocrinol* 168:  
690 325-332.
- 691 42. Huang J, Dibble CC, Matsuzaki M, Manning BD (2008) The TSC1-TSC2  
692 complex is required for proper activation of mTOR complex 2. *Mol Cell Biol*  
693 28: 4104-4115.
- 694 43. Huang J, Wu S, Wu CL, Manning BD (2009) Signaling events downstream of  
695 mammalian target of rapamycin complex 2 are attenuated in cells and  
696 tumors deficient for the tuberous sclerosis complex tumor suppressors.  
697 *Cancer Res* 69: 6107-6114.
- 698 44. Carson RP, Van Nielen DL, Winzenburger PA, Ess KC (2012) Neuronal and  
699 glia abnormalities in Tsc1-deficient forebrain and partial rescue by  
700 rapamycin. *Neurobiol Dis* 45: 369-380.
- 701 45. Hsu PP, Kang SA, Rameseder J, Zhang Y, Ottina KA, et al. (2011) The mTOR-  
702 regulated phosphoproteome reveals a mechanism of mTORC1-mediated  
703 inhibition of growth factor signaling. *Science* 332: 1317-1322.
- 704 46. Yu Y, Yoon SO, Pouligiannis G, Yang Q, Ma XM, et al. (2011)  
705 Phosphoproteomic analysis identifies Grb10 as an mTORC1 substrate that  
706 negatively regulates insulin signaling. *Science* 332: 1322-1326.
- 707 47. Kobayashi T, Minowa O, Sugitani Y, Takai S, Mitani H, et al. (2001) A germ-  
708 line Tsc1 mutation causes tumor development and embryonic lethality that  
709 are similar, but not identical to, those caused by Tsc2 mutation in mice. *Proc*  
710 *Natl Acad Sci U S A* 98: 8762-8767.
- 711 48. Wilson C, Idziaszczyk S, Parry L, Guy C, Griffiths DF, et al. (2005) A mouse  
712 model of tuberous sclerosis 1 showing background specific early post-natal  
713 mortality and metastatic renal cell carcinoma. *Hum Mol Genet* 14: 1839-  
714 1850.
- 715 49. Kobayashi T, Minowa O, Kuno J, Mitani H, Hino O, et al. (1999) Renal  
716 carcinogenesis, hepatic hemangiomas, and embryonic lethality caused  
717 by a germ-line Tsc2 mutation in mice. *Cancer Res* 59: 1206-1211.
- 718 50. Onda H, Lueck A, Marks PW, Warren HB, Kwiatkowski DJ (1999) Tsc2(+/-)  
719 mice develop tumors in multiple sites that express gelsolin and are  
720 influenced by genetic background. *J Clin Invest* 104: 687-695.
- 721 51. Shimobayashi M, Hall MN (2014) Making new contacts: the mTOR network in  
722 metabolism and signalling crosstalk. *Nat Rev Mol Cell Biol* 15: 155-162.

- 723 52. Dbouk HA, Vadas O, Shymanets A, Burke JE, Salamon RS, et al. (2012) G  
724 protein-coupled receptor-mediated activation of p110beta by Gbetagamma  
725 is required for cellular transformation and invasiveness. *Sci Signal* 5: ra89.
- 726 53. Leopoldt D, Hanck T, Exner T, Maier U, Wetzker R, et al. (1998) Gbetagamma  
727 stimulates phosphoinositide 3-kinase-gamma by direct interaction with two  
728 domains of the catalytic p110 subunit. *J Biol Chem* 273: 7024-7029.
- 729 54. O'Hayre M, Degese MS, Gutkind JS (2014) Novel insights into G protein and G  
730 protein-coupled receptor signaling in cancer. *Curr Opin Cell Biol* 27: 126-  
731 135.
- 732 55. Verma R, Marchese A (2015) The endosomal sorting complex required for  
733 transport pathway mediates chemokine receptor CXCR4-promoted  
734 lysosomal degradation of the mammalian target of rapamycin antagonist  
735 DEPTOR. *J Biol Chem* 290: 6810-6824.
- 736 56. Robles-Molina E, Dionisio-Vicuna M, Guzman-Hernandez ML, Reyes-Cruz G,  
737 Vazquez-Prado J (2014) Gbetagamma interacts with mTOR and promotes  
738 its activation. *Biochem Biophys Res Commun* 444: 218-223.
- 739 57. Albert V, Svensson K, Shimobayashi M, Colombi M, Munoz S, et al. (2016)  
740 mTORC2 sustains thermogenesis via Akt-induced glucose uptake and  
741 glycolysis in brown adipose tissue. *EMBO Mol Med* 8: 232-246.
- 742 58. Mukaida S, Evans BA, Bengtsson T, Hutchinson DS, Sato M (2017)  
743 Adrenoceptors promote glucose uptake into adipocytes and muscle by an  
744 insulin-independent signaling pathway involving mechanistic target of  
745 rapamycin complex 2. *Pharmacol Res* 116: 87-92.
- 746 59. Sato M, Evans BA, Sandstrom AL, Chia LY, Mukaida S, et al. (2018) alpha1A-  
747 Adrenoceptors activate mTOR signalling and glucose uptake in  
748 cardiomyocytes. *Biochem Pharmacol* 148: 27-40.
- 749 60. Mombaerts P, Wang F, Dulac C, Chao S, Nemes A, et al. (1996) Visualizing an  
750 olfactory sensory map. *Cell* 87: 675-686.
- 751 61. Liberles S, Buck L (2006) A second class of chemosensory receptors in the  
752 olfactory epithelium. *Nature* 442: 645-650.
- 753 62. Michaloski J, Galante P, Malnic B (2006) Identification of potential regulatory  
754 motifs in odorant receptor genes by analysis of promoter sequences.  
755 *Genome Research* 16: 1091-1098.
- 756 63. Livak KJ, Schmittgen TD (2001) Analysis of relative gene expression data  
757 using real-time quantitative PCR and the 2(-Delta Delta C(T)) Method.  
758 *Methods* 25: 402-408.
- 759 64. Trapnell C, Pachter L, Salzberg SL (2009) TopHat: discovering splice junctions  
760 with RNA-Seq. *Bioinformatics* 25: 1105-1111.
- 761 65. Yates A, Akanni W, Amode MR, Barrell D, Billis K, et al. (2016) Ensembl 2016.  
762 *Nucleic Acids Res* 44: D710-716.
- 763 66. Li H, Handsaker B, Wysoker A, Fennell T, Ruan J, et al. (2009) The Sequence  
764 Alignment/Map format and SAMtools. *Bioinformatics* 25: 2078-2079.
- 765 67. Trapnell C, Roberts A, Goff L, Pertea G, Kim D, et al. (2012) Differential gene  
766 and transcript expression analysis of RNA-seq experiments with TopHat and  
767 Cufflinks. *Nat Protoc* 7: 562-578.

768 68. Wang B, Fallon JF, Beachy PA (2000) Hedgehog-regulated processing of Gli3  
769 produces an anterior/posterior repressor gradient in the developing  
770 vertebrate limb. Cell 100: 423-434.

771

772

## 773 **Figure Legends**

774

775 **Fig 1. Ric-8B gene trap mice.** (A) The genomic structure of the Ric-8B gene is  
776 shown, with its ten exons (1-10) and nine introns (between the exons) and the  
777 insertion sites of the gene trap vector in the ES cell lines RRH188 and RRA103.  
778 The insertion of the gene trap vector in intron 3 in the RRH188 cell line leads to the  
779 expression of chimeric mRNA containing exons 1, 2 and 3 in frame with the  $\beta$ -geo  
780 sequence. The locations of the primers used for PCR-based genotyping are  
781 indicated. SA: splice acceptor site. The Ric-8B $\Delta$ 9 isoform lacks exon 9 (indicated in  
782 grey), is indicated. B) Multiplex PCR-based genotyping of the embryos obtained  
783 from intercrossing of heterozygous mice using one forward primer (188intronF2)  
784 and two reverse primers (VectorR2 and 188intronR2). A 312 bp PCR product is  
785 expected for the mutant allele, and a 582 bp PCR product is expected for the wild  
786 type allele. Representative analyzed embryos showed the following genotypes:  
787 Ric-8B<sup>wt/wt</sup> (wild type, lanes 1, 3 and 5), Ric-8B<sup>wt/bgeo</sup> (heterozygote, lanes 2 and 4)  
788 and Ric-8B<sup>bgeo/bgeo</sup> (homozygous, lanes 6 and 7). (C) Ric-8B gene expression in  
789 the mouse embryo. RT-PCR was conducted to amplify Ric-8B and Ric-8B $\Delta$ 9  
790 transcripts from RNA prepared from wild type mouse embryos at different  
791 developmental stages. The PCR product sizes expected using the pair of primers  
792 that flank the ninth exon (A) are 462 bp (Ric-8B) and 342 bp (Ric-8B $\Delta$ 9). (D) RT-  
793 PCR was conducted to amplify the regions between exon 3 and exon 5 (1) and  
794 exon 7 and exon 10 (2) of Ric-8B and actin (3) from embryos with different  
795 genotypes as indicated. (E) Real-time PCR was conducted to compare the



796 expression levels of the Ric-8B gene in wild type (Ric-8B<sup>wt/wt</sup>), heterozygotes (Ric-  
797 8B<sup>wt/bgeo</sup>) and homozygous (Ric-8B<sup>bgeo/bgeo</sup>) mutant embryos. Transcript levels were  
798 normalized to  $\beta$ -actin levels and are shown relative to the expression levels in wild  
799 type embryos. (F) Western blot analysis of protein extracts from embryos with the  
800 different genotypes using anti-Ric-8B antibodies.  $\alpha$ -tubulin was used as a loading  
801 control.

802

803 **Fig 2. Ric-8B expression in the adult Ric-8B<sup>wt/bgeo</sup> mouse as revealed by X-gal**  
804 **staining.** (A) Sagittal whole-mount view of the nasal cavity and brain stained with  
805 X-gal. Blue staining can be detected in the olfactory epithelium (OE) and septal  
806 organ (SO), but not in the olfactory bulb (OB) nor in the vomeronasal organ (VNO).  
807 (B) The brain region is cut in a parasagittal plane, revealing blue staining of the  
808 striatum. (C-G) X-gal staining of sections cut through the nasal cavity of Ric-8B  
809 <sup>wt/bgeo</sup> mice (C, D and F) or Ric-8B <sup>wt/wt</sup> mice (E and G). X-gal staining is present  
810 throughout the olfactory epithelium (C, D and F), and in the septal organ region  
811 (arrow in D). In the same experimental conditions, no staining is observed in the  
812 wild type tissues. Sections in A-G were taken from the regions indicated in the  
813 schematic representation of the mouse brain.

814

815 **Fig 3. Ric-8B mutant embryos are smaller and show defective neural tube**  
816 **closure in the cephalic region.** (A-F') Wild type (Ric-8B<sup>wt/wt</sup>), heterozygous (Ric-  
817 8B<sup>wt/bgeo</sup>) or homozygous (Ric-8B<sup>bgeo/bgeo</sup>) embryos at E8.5 or E9.5 stained with X-  
818 gal are shown (not shown in scale). Ventral (D-F) and dorsal (D'-F') views of the

819 embryos are shown. In the Ric-8B<sup>bgeo/bgeo</sup> embryos, the cephalic neural folds are  
820 not fused (white arrows) but the other regions of the neural tube are normally  
821 closed (F, F'). (G-I) Wild type (Ric-8B<sup>wt/wt</sup>), heterozygous (Ric-8B<sup>wt/bgeo</sup>) or  
822 homozygous (Ric-8B<sup>bgeo/bgeo</sup>) embryos were examined by scanning electron  
823 microscopy at E9.5. G', H' and I' are magnified regions from G, H and I,  
824 respectively. P (prosencephalon), BA (first branchial arch). Scale bars in G- I  
825 represent 100  $\mu$ m, in G'-I', 50  $\mu$ m. (J) Representative images of a wild type and a  
826 homozygous mutant embryo (shown in scale).

827

828 **Fig 4. Ric-8B expression in the embryo is predominant in the nervous system**

829 . Upper panels: sagittal views of a Ric-8B<sup>wt/bgeo</sup> embryo (A) or a Ric-8B<sup>bgeo/bgeo</sup>  
830 embryo (C) at E8.5. The lines indicate the levels at which the sections were cut  
831 (shown in B and D). In the Ric-8B<sup>wt/bgeo</sup> embryo (A and B), blue staining is detected  
832 in the neural folds in the brain region (asterisk) and in the notochord (nc). In the  
833 Ric-8B<sup>bgeo/bgeo</sup> embryo (C and D) blue staining is detected in the same regions as in  
834 the Ric-8B<sup>wt/bgeo</sup> embryo, however the staining is stronger and expanded.

835 Lower panels: sagittal and ventral views of a Ric-8B<sup>wt/bgeo</sup> embryo (E and F) or a  
836 Ric-8B<sup>bgeo/bgeo</sup> embryo (I and J) at E9.5. In the Ric-8B<sup>wt/bgeo</sup> embryo (E-H), blue  
837 staining is detected in the neural fold fusion in the brain region (arrows) and in the  
838 floor plate region (fp). Note that the neural tube is closed (arrow in G). (H) Higher  
839 magnification of the neural tube in the Ric-8B<sup>wt/bgeo</sup> embryo showing strong blue  
840 staining in the floor plate region and weaker staining in the notochord. In the Ric-  
841 8B<sup>bgeo/bgeo</sup> embryo (I- L) blue staining is detected in the same regions as in the Ric-

842 8B<sup>wt/bgeo</sup> embryo; however, the staining is stronger and expanded. Note that the  
843 neural tube is not closed in the anterior region of the head (arrows in K) but are  
844 normally closed at the more caudal regions. (L) Higher magnification of the neural  
845 tube in the Ric-8B<sup>bgeo/bgeo</sup> embryo showing strong blue staining in both the floor  
846 plate (fp) and notochord (nc) regions. Me (mesenchyme).

847

848 **Fig 5. Increased apoptosis in Ric-8B<sup>bgeo/bgeo</sup> embryos and MEFs. (A)**

849 Transverse sections of E9.5 embryos stained with rhodamine-conjugated phalloidin  
850 (red) show that actin filament (F-actin) is highly concentrated in the apical region of  
851 the neural tube in wild type, heterozygous and mutant embryos. (B) Transverse  
852 sections of E9.5 embryos stained for active caspase 3 (green). Ric-8B<sup>bgeo/bgeo</sup>  
853 embryos show an increased number of apoptotic cells in the mesenchyme and  
854 neuroepithelium when compared to wild type or heterozygous embryos. DAPI was  
855 used to stain the nuclei. Forebrain (fb); mesenchyme (me); midbrain (mb);  
856 hindbrain (hb); neuroepithelium (ne). The approximate localizations of the sections  
857 are indicated to the right. (C) MEFs were generated from Ric-8B<sup>wt/wt</sup> (n=2) or Ric-  
858 8B<sup>bgeo/bgeo</sup> (n=1) embryos were double stained for BrdU (red) and activated  
859 caspase-3 (green). The percentages of cells labeled in each case are indicated in  
860 the graph.

861

862 **Fig 6. Phosphorylation of Akt (Ser 473) is decreased in Ric-8B<sup>bgeo/bgeo</sup>**

863 **embryos.** (A) Cell signaling pathways predicted to be altered in the Ric-8B mutant  
864 embryos. Top 10 altered signaling pathways, as predicted by IPA, are shown. The  
865 ranking was based on the p values derived from the Fisher's exact test (IPA). The

866 x axis displays the – (log) p value. (B) Western blot of P-Akt Ser 473 and total Akt1  
867 content in E9.5 embryos from the different Ric-8B genotypes.  $\beta$ -actin was used as  
868 loading control. (C) Western blot analysis of P-Akt Thr308 in E9.5 embryos  
869 compared to pan-Akt. (D) Semi-quantitative analysis of Akt (Ser 473)  
870 phosphorylation in E9.5 embryos. The graph shows the quantification of the ratio of  
871 P-Akt Ser 473 compared to pan-Akt. Values are expressed relative to wild type  
872 embryo levels and shown as mean  $\pm$  S.E.M. (each dot represents an embryo), \*,  
873  $P < 0.05$ . A representative Western blot is shown below the graph. (E) Semi-  
874 quantitative analysis of S6 phosphorylation in E9.5 embryos. The graph shows the  
875 quantification of the ratio of P-S6 compared to total S6. Values are expressed  
876 relative to wild type embryo levels and shown as mean  $\pm$  S.E.M. (each dot  
877 represents an embryo). A representative Western blot is shown below the graph.  
878

879 **Fig 7. Ric-8B is required for mTORC2 activation in HEK293T cells.** (A)  
880 Schematic representation of the Ric-8B gene structure showing the regions  
881 targeted by the shRNAs used to knockdown endogenous expression of Ric-8B in  
882 HEK293T cells. (B) HEK293T cell lines containing a control shRNA (shRNA for  
883 luciferase) or the Ric-8B shRNA17 were starved for 4 hours and stimulated with  
884 FBS for 5, 15, 30 or 45 minutes. Total protein lysates were analyzed in Western  
885 blot experiments for the expression of the indicated proteins. (C) Total lysates  
886 prepared from HEK293T cell lines expressing a control shRNA, Ric-8B shRNA16  
887 or Ric-8B shRNA17 were analyzed in Western blot experiments for the expression  
888 of  $G\alpha_s$ . (D) Schematic representation of how Ric-8B may act to regulate mTORC2

889 activity. Growth factors activate PI3K at the cell membrane leading to the  
890 production of PIP3, recruitment of Akt and PDK1 and phosphorylation of Akt at  
891 Threonine 308 by PDK1. As more recently shown, mTORC2 can be activated via  
892 GPCR signaling. Depletion of Ric-8B impairs function and/or stability of G $\alpha$  and  
893 G $\beta\gamma$  subunits. As a consequence, phosphorylation of Akt at Serine 473 by  
894 mTORC2 is reduced. The exact mechanism through which G protein is required for  
895 mTORC2 activity remains to be elucidated (dashed arrow). Akt-Ser 473  
896 phosphorylation is known to be required for mTORC2 function in cell survival [36].  
897 Ric-8B may also have targets that are unrelated to G proteins and are yet to be  
898 identified. Phosphorylated substrates analyzed in our experiments are indicated in  
899 green.

900

901

## 902 **Supporting Information**

903 **S1 Fig. Expression of Ric-8B as revealed by  $\beta$ -galactosidase activity in**  
904 **different mouse tissues.** The table shows the results obtained by whole-mount X-  
905 gal staining of adult Ric-8B<sup>wt/bgeo</sup> mouse tissues. (+) blue staining; (-) no staining  
906 was detected. Some of the analyzed tissues (prostate, intestine, kidney, testis and  
907 seminal vesicle) showed endogenous  $\beta$ -galactosidase activity.

908

909 **S2 Fig. Identification of the precise site of vector insertion in the Ric-8B**  
910 **gene.** The locations of the primers used for the identification of the site of insertion  
911 of the gene trap vector are indicated. Different pairs of primers were used in PCR

912 reactions with genomic DNA prepared from heterozygous mice as indicated. PCR  
913 products were only obtained for the 188intronF1/Vector R and 188intronF2/ Vector  
914 R pairs of primers, indicating that the vector is inserted ~150 bp downstream to the  
915 region matched by the primer 188intronF2.

916 **S3 Fig.- Primer sequences.** List of primer sequences used for genotyping of the  
917 embryos and RT-PCR experiments.

918 **S4 Fig. Shh signaling in Ric-8B<sup>bgeo/bgeo</sup> embryos.** (A) Transverse sections cut  
919 through the neural tubes of X-gal stained Ric-8B<sup>wt/bgeo</sup> embryos at different  
920 developmental stages shows that  $\beta$ -galactosidase activity is restricted to the floor  
921 plate. (B) The expression of the floor plate markers Shh and FoxA2, in addition to  
922 Ptch1, a direct target of the Shh signaling pathway, was indistinguishable between  
923 the neural tubes from E9.5 Ric-8B<sup>wt/wt</sup> and Ric-8B<sup>bgeo/bgeo</sup> embryos, indicating that  
924 the most ventral neural types are normally specified in Ric-8B<sup>bgeo/bgeo</sup> embryos.  
925 Transverse section cut through the neural tubes were hybridized with antisense  
926 probes specific for Shh, FoxA2 and Ptch1. (C) The Gli3 protein is one of the major  
927 transcription factors that mediate the transcriptional effects of Shh signaling. In the  
928 absence of Shh signaling, Gli3 is proteolytically processed to produce a form that  
929 acts as a transcriptional repressor [68]. Western blotting with antibody against Gli3  
930 was used to analyze total protein extracts prepared from E9.5 whole embryos. The  
931 amounts of both the activator (Gli3 FL, 230 kDa) and repressor (Gli3 R, 83 kDa)  
932 forms of Gli3 in Ric-8B<sup>bgeo/bgeo</sup> embryos are not different from the ones shown by  
933 wild type or heterozygous embryos. Quantification of relative amounts of Gli3 FL

934 and Gli3 R normalized to respective  $\alpha$ -tubulin levels is shown at the bottom of the  
935 blot. Gli3 FL (Gli3 full length); Gli3 R (Gli3 repressor).

936

937 **S5 Fig. Signaling pathways involving G proteins altered in the Ric-8B mutant**

938 **embryos.** (A)  $G\alpha$  subunits and Ric-8B gene expression in the embryo. Sections

939 cut through the neural tube of an E10.5 wild type embryo were hybridized with

940 digoxigenin-labeled antisense RNA probes for Ric-8B,  $G\alpha_{olf}$  and  $G\alpha_s$ , as

941 indicated. (B) Signaling pathways involving G proteins that are altered in the Ric-

942 8B mutant embryos, as identified by IPA, are shown.

943

944 **S6 Fig. Ric-8B protein expression in the Ric-8B knockdown cell lines.**

945 HEK293T cell lines transfected with control shRNAs (SCR, Scrambled or LUC,

946 luciferase) or with the different shRNAs targeting Ric-8B (shRNA15, shRNA16 and

947 shRNA17) were treated with doxycycline. Total lysates prepared from these cells

948 were analyzed in Western blot experiments for the expression of Ric-8B.

949 Doxycycline (Dox) concentrations used to induce shRNA expression are indicated.

950

951 **S1 Table. List of all significant downregulated genes in Ric-8B<sup>bgeo/bgeo</sup>**

952 **embryos.**

953

954 **S2 Table. List of all significant upregulated genes in Ric-8B<sup>bgeo/bgeo</sup> embryos.**

OE OB

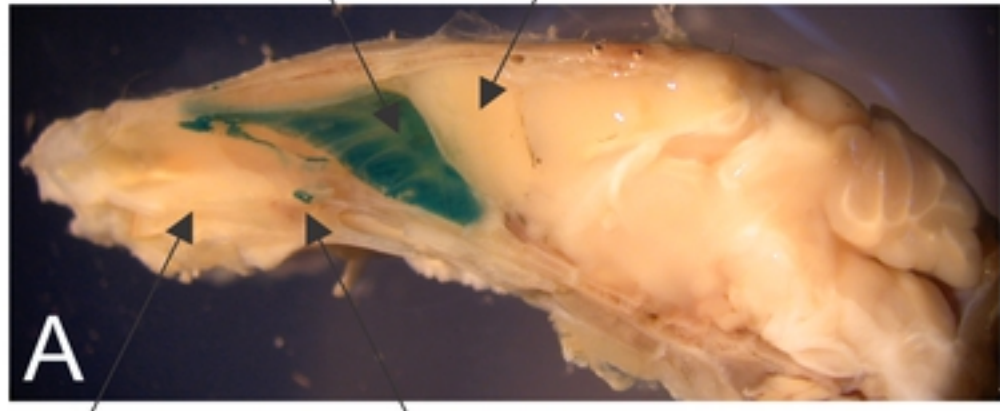

A

VNO SO striatum

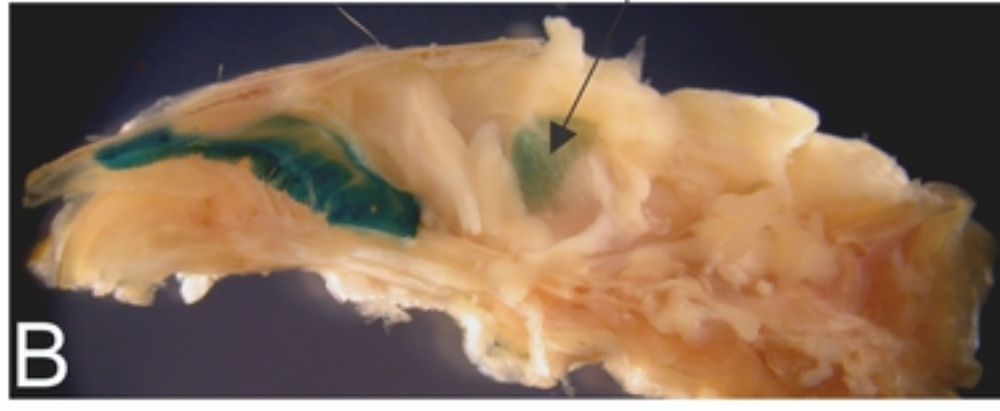

B

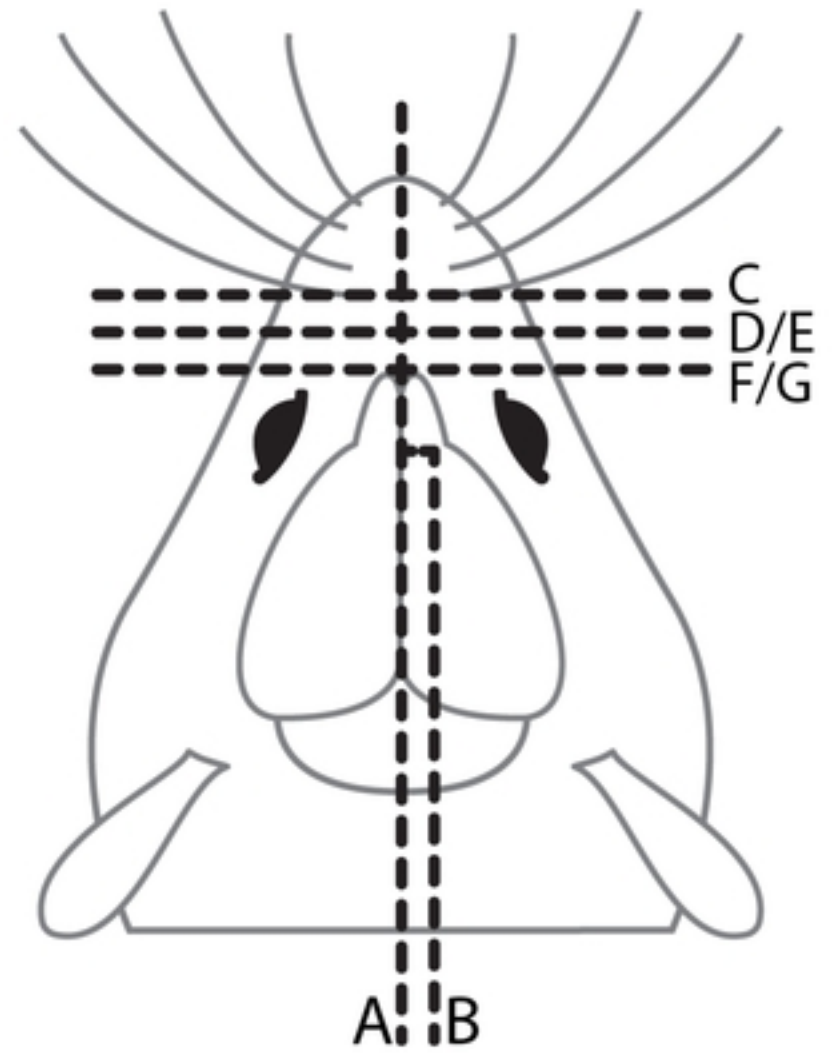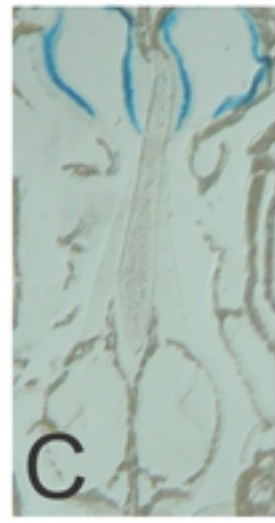

C

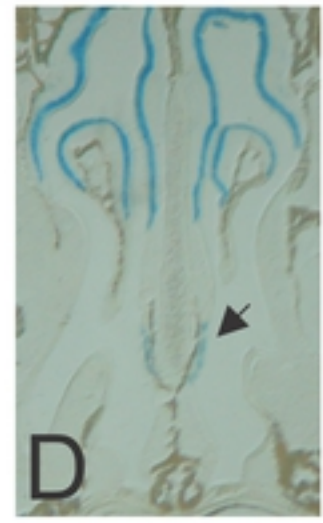

D

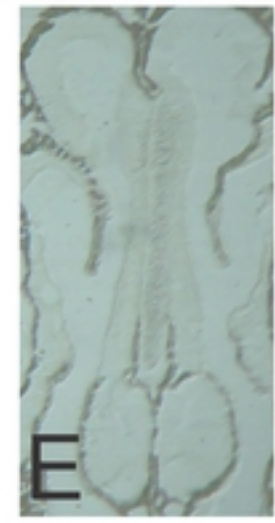

E

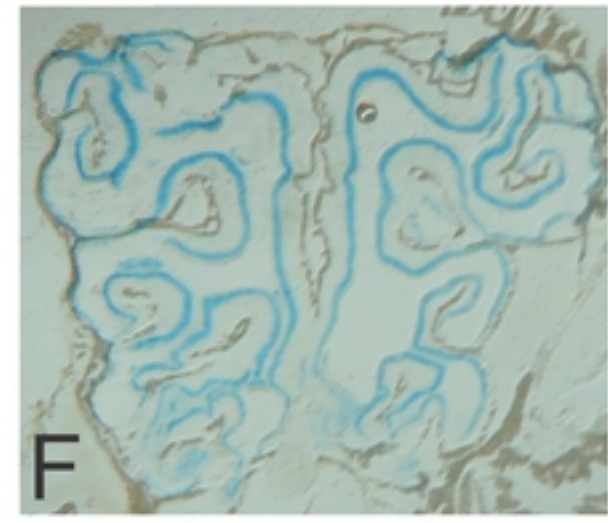

F

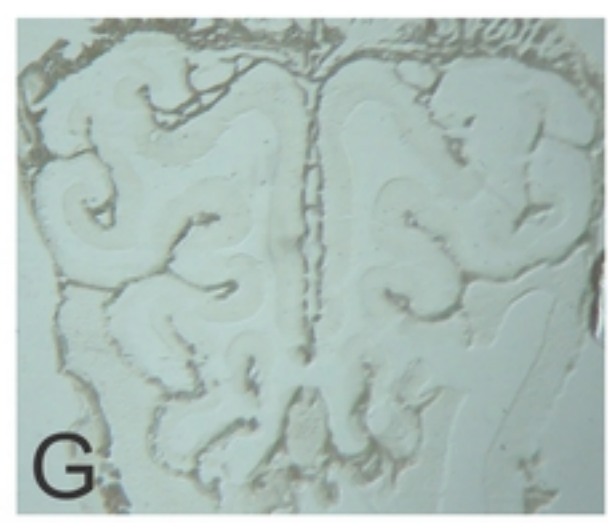

G

Figure 2



A

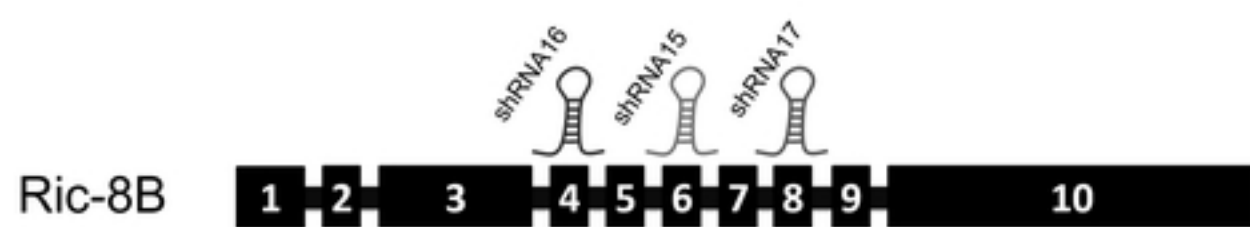

B

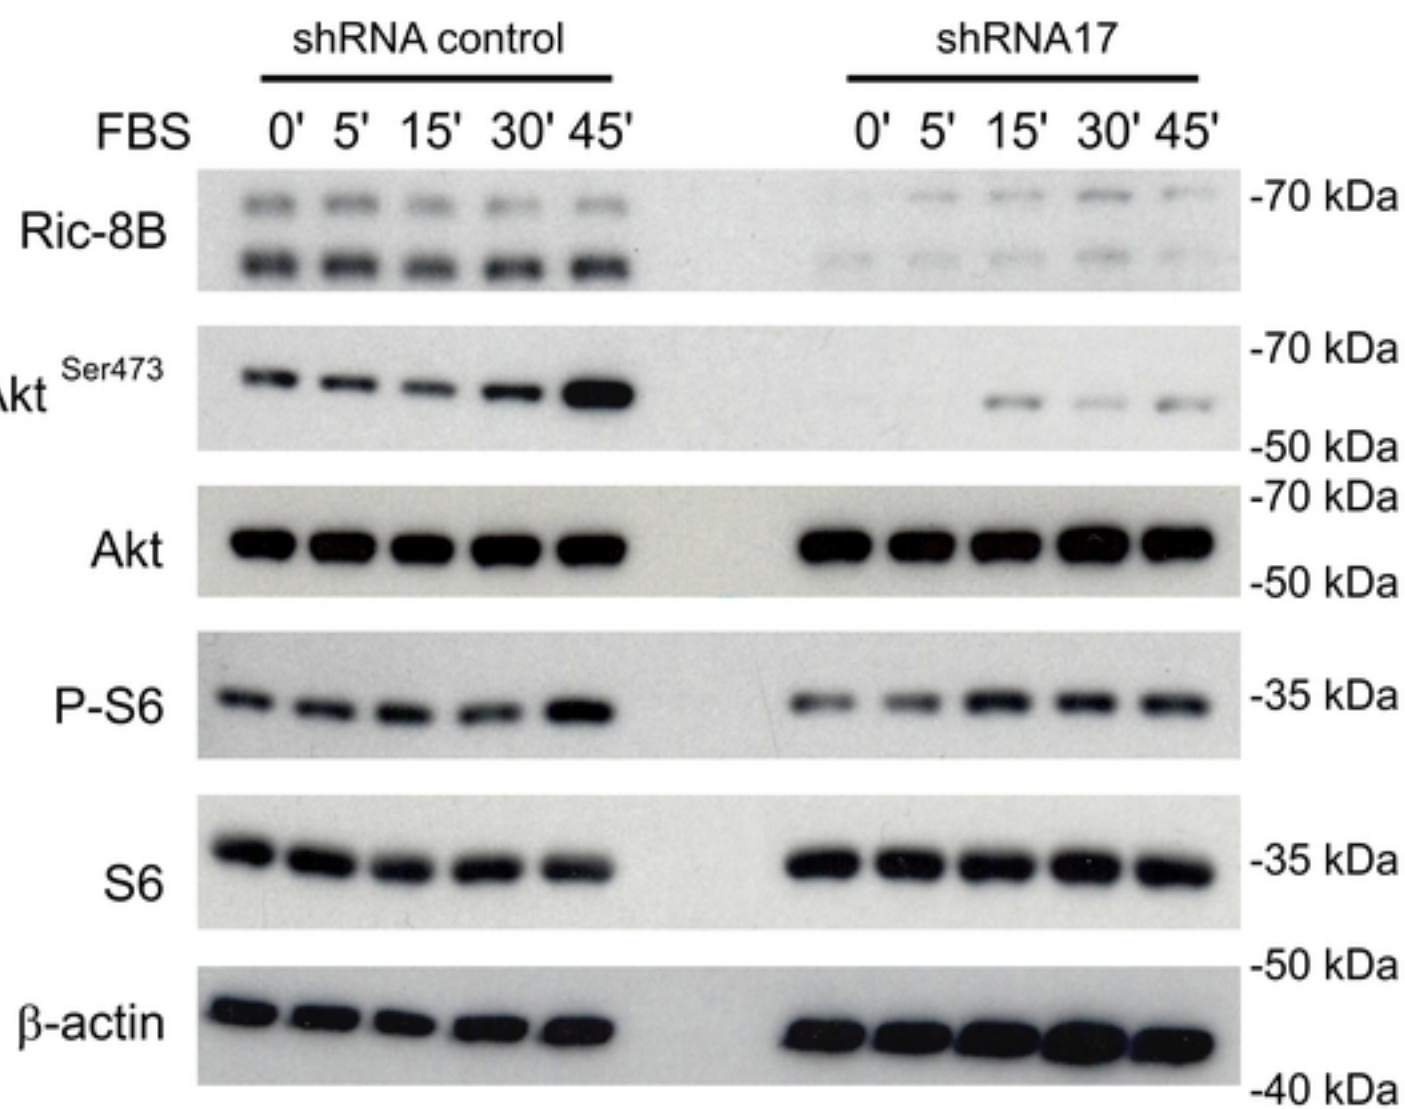

C

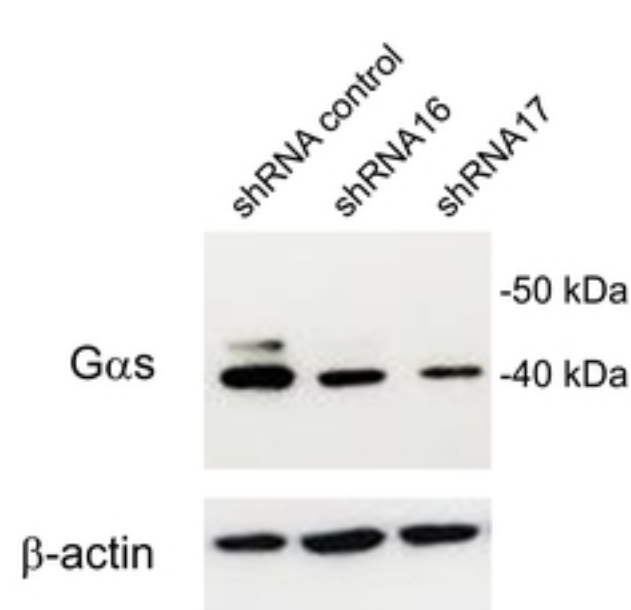

D

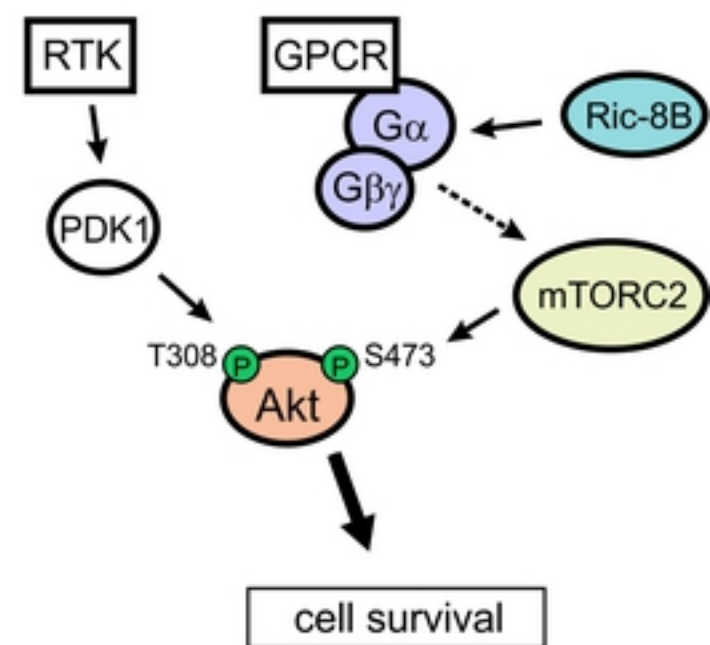

Figure 7

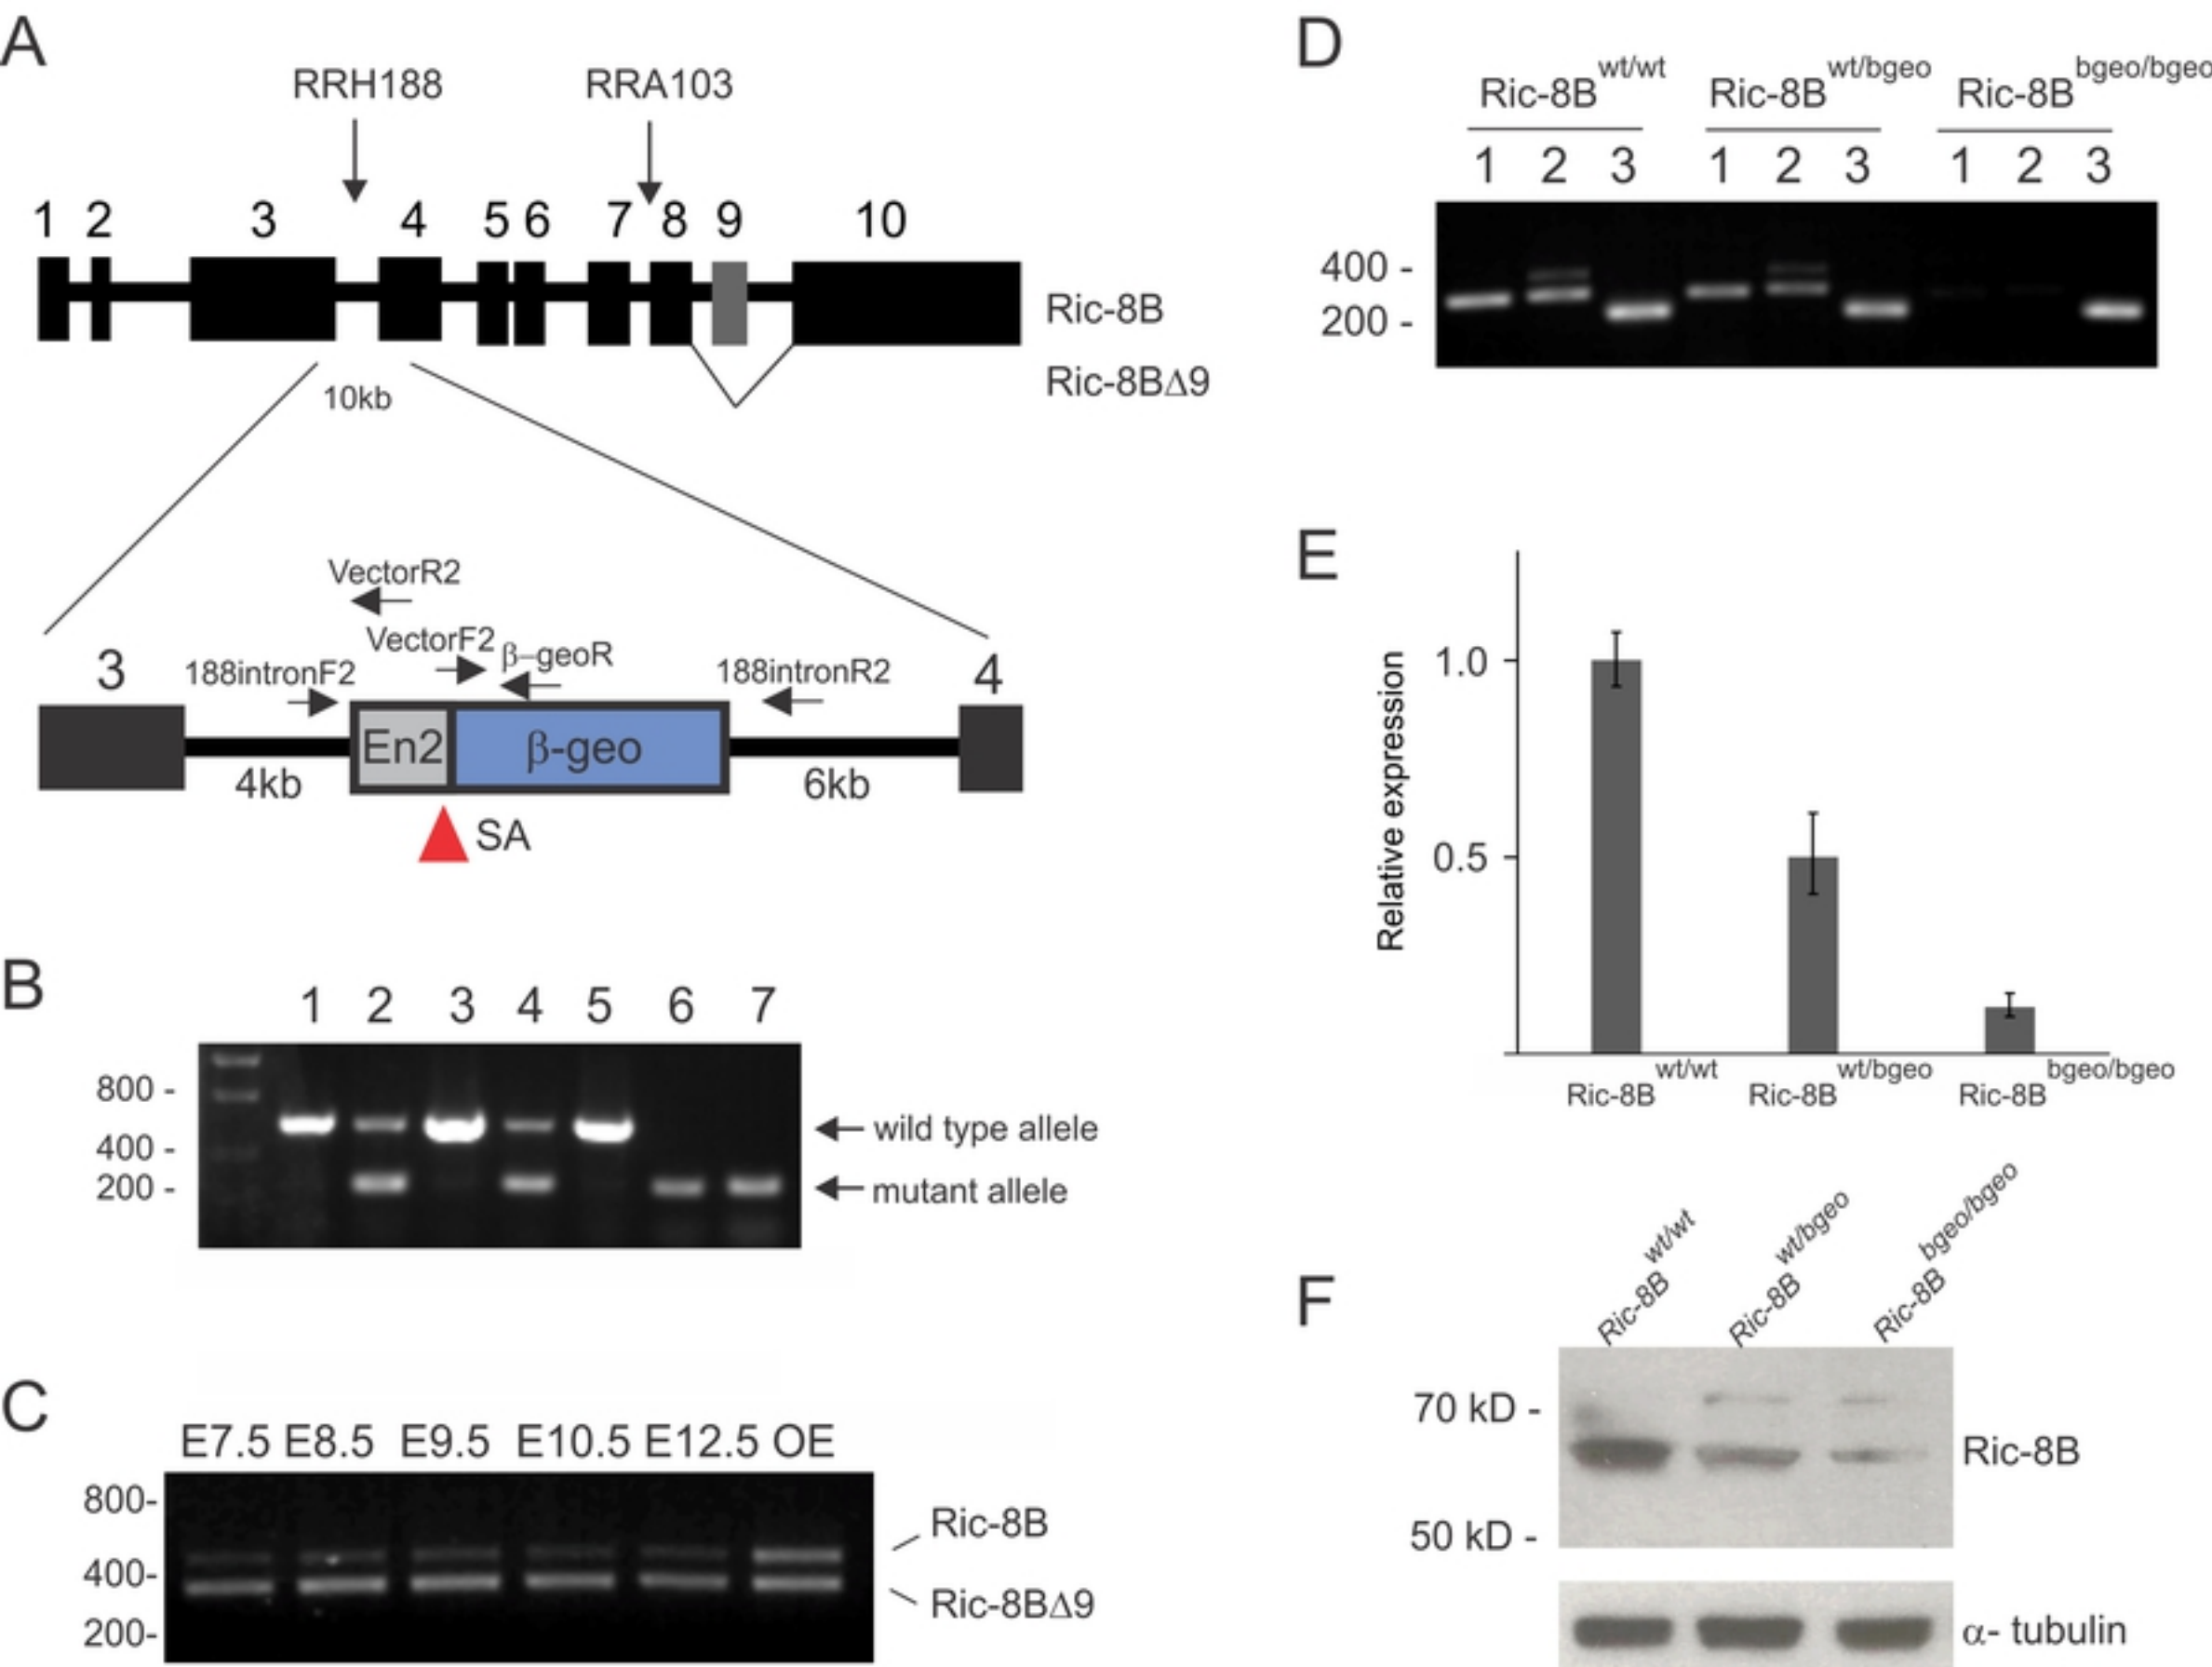

Figure 1

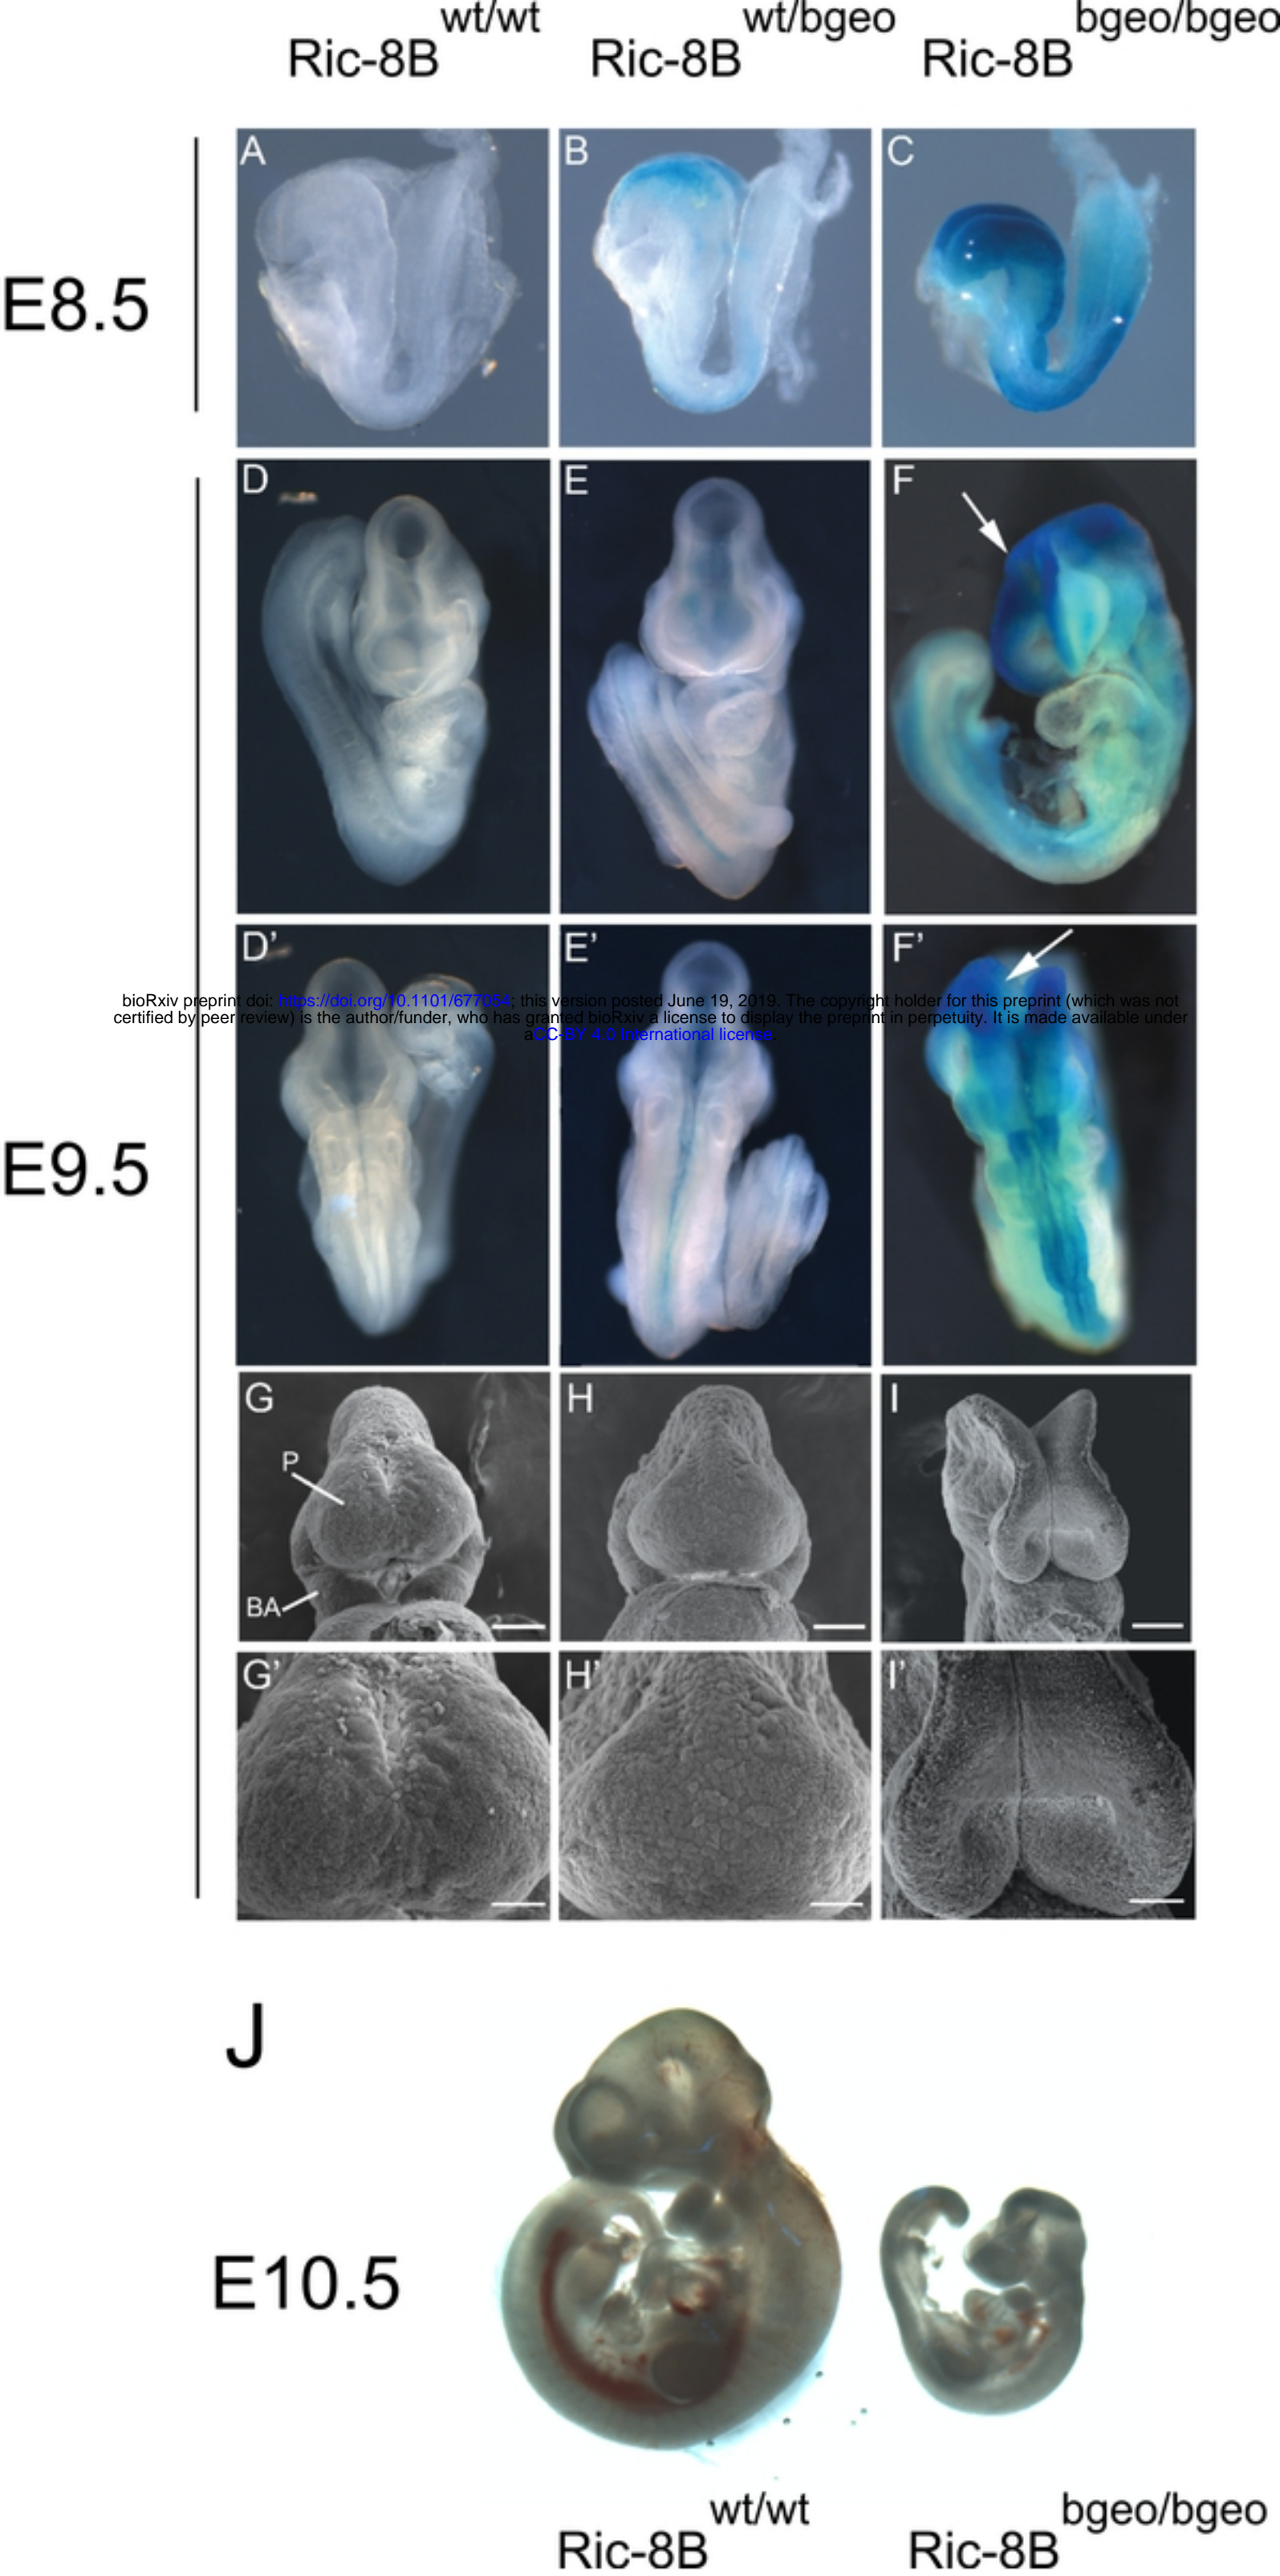

Figure 3

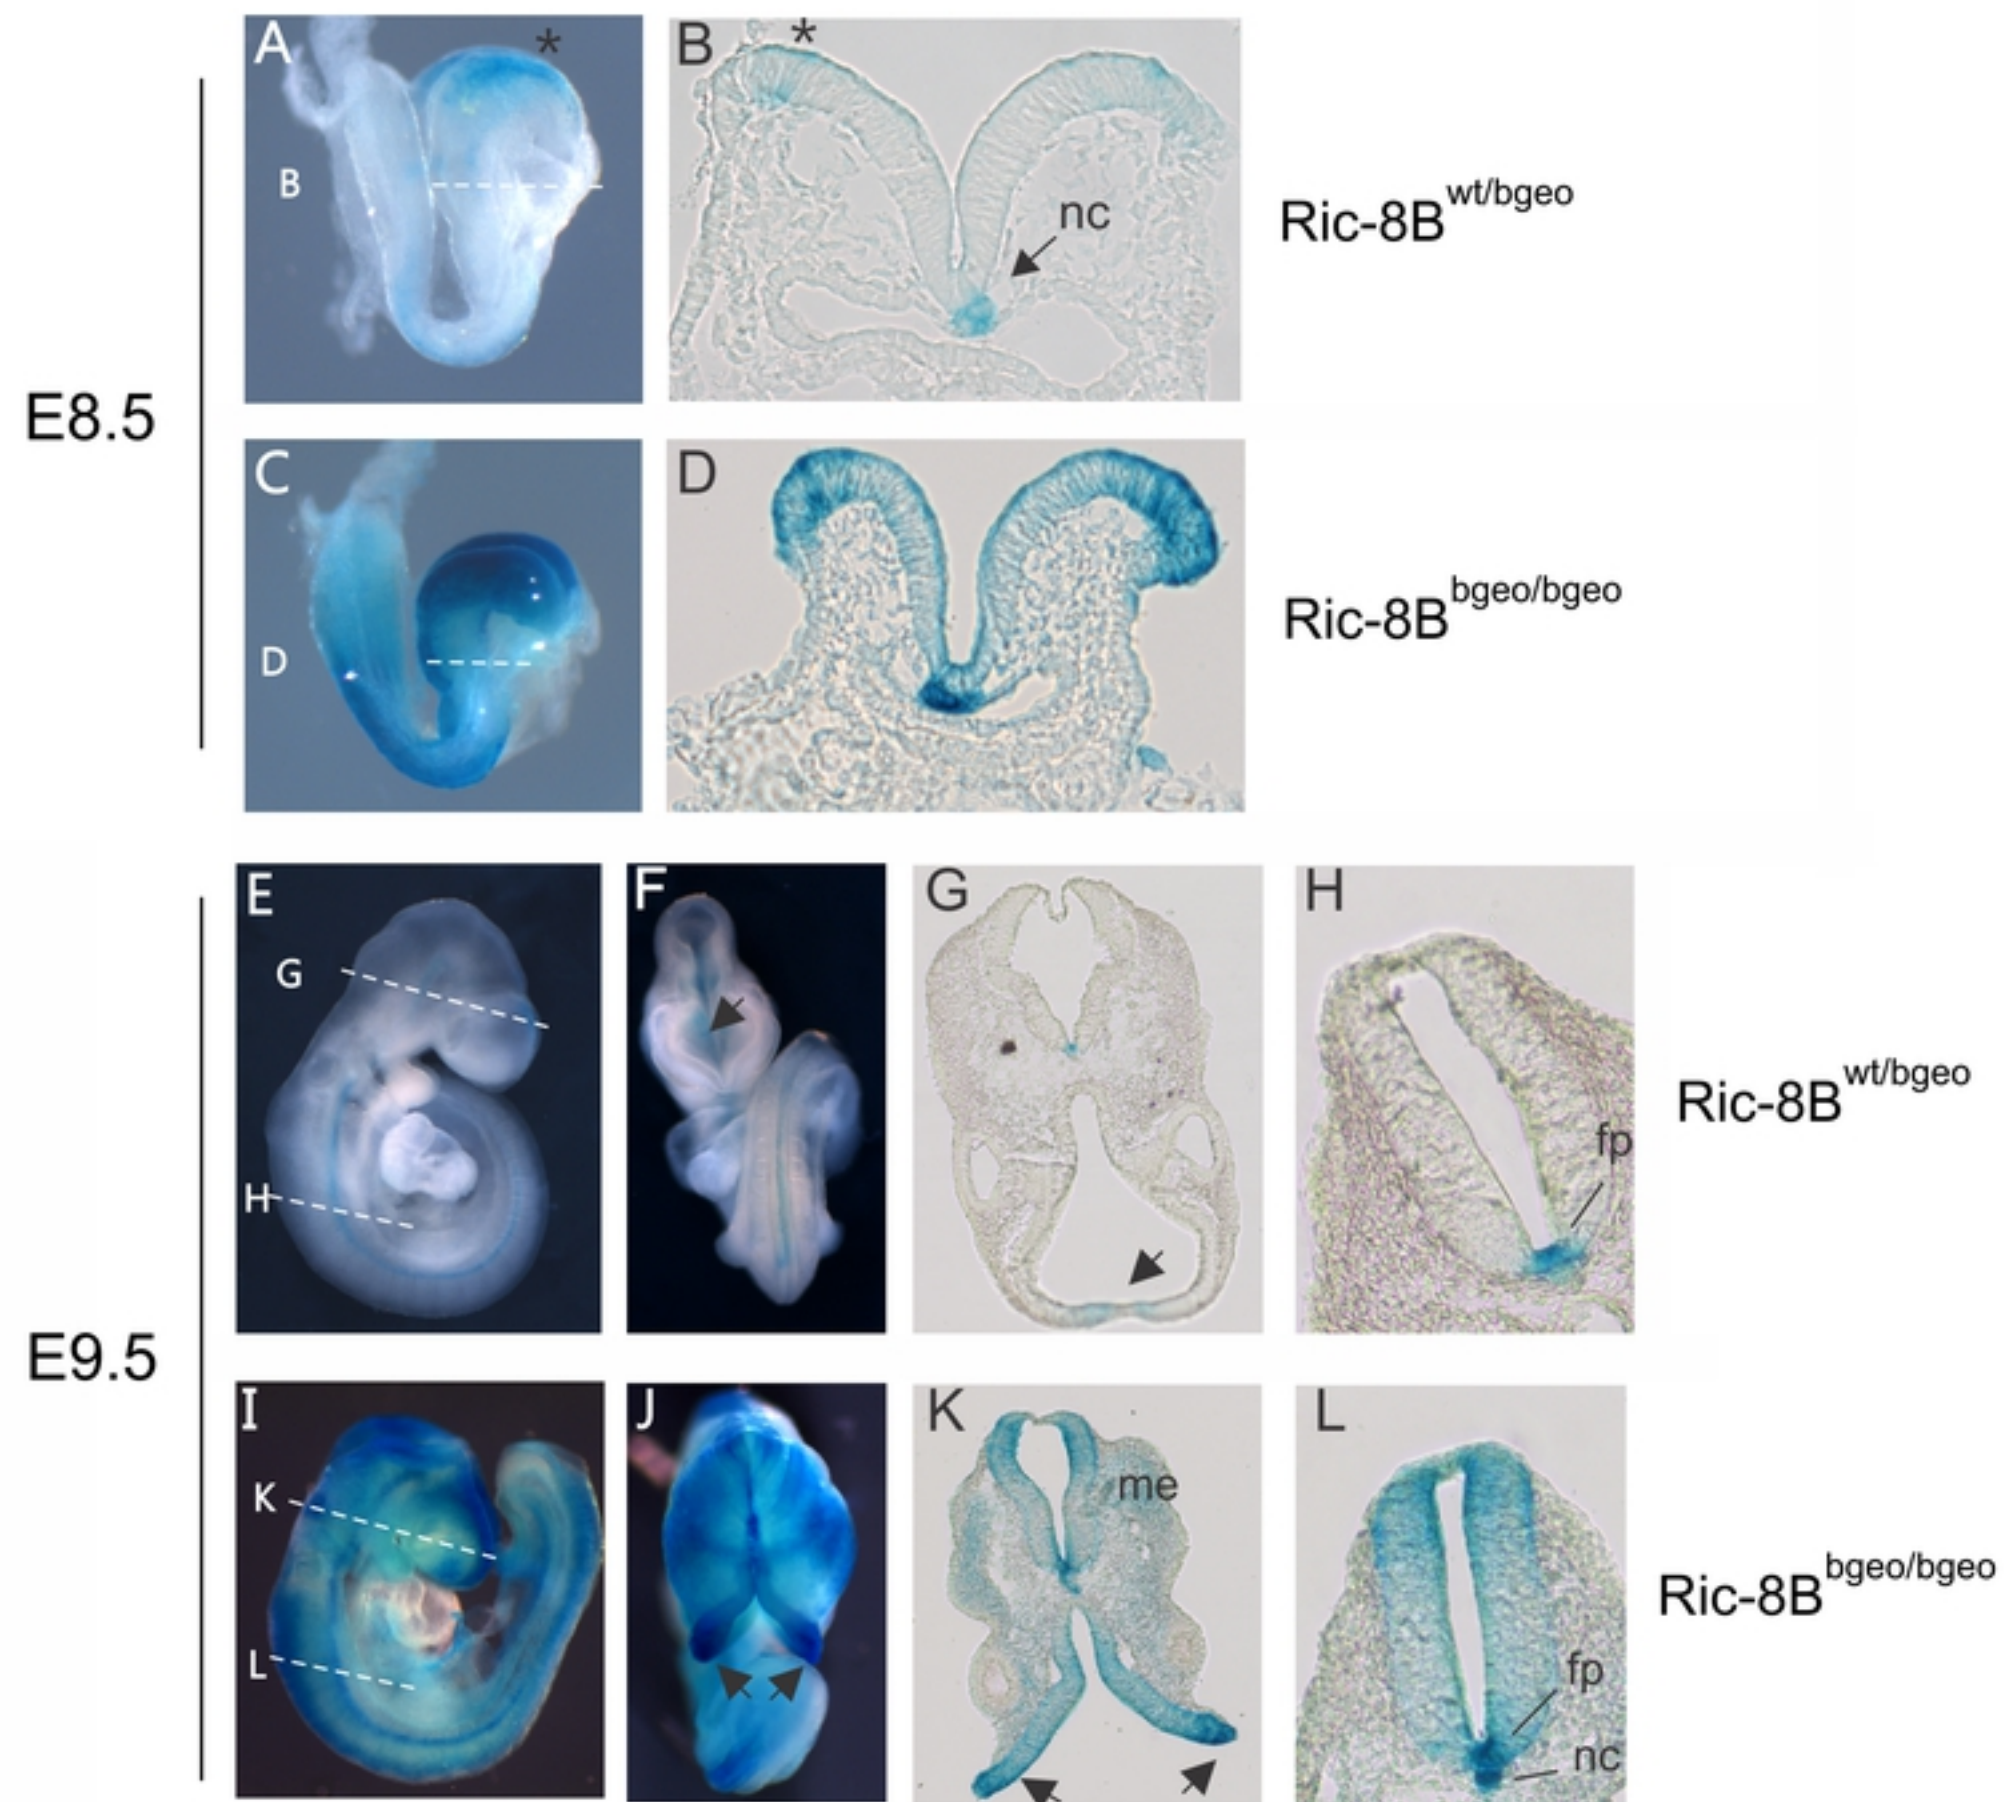

Figure 4

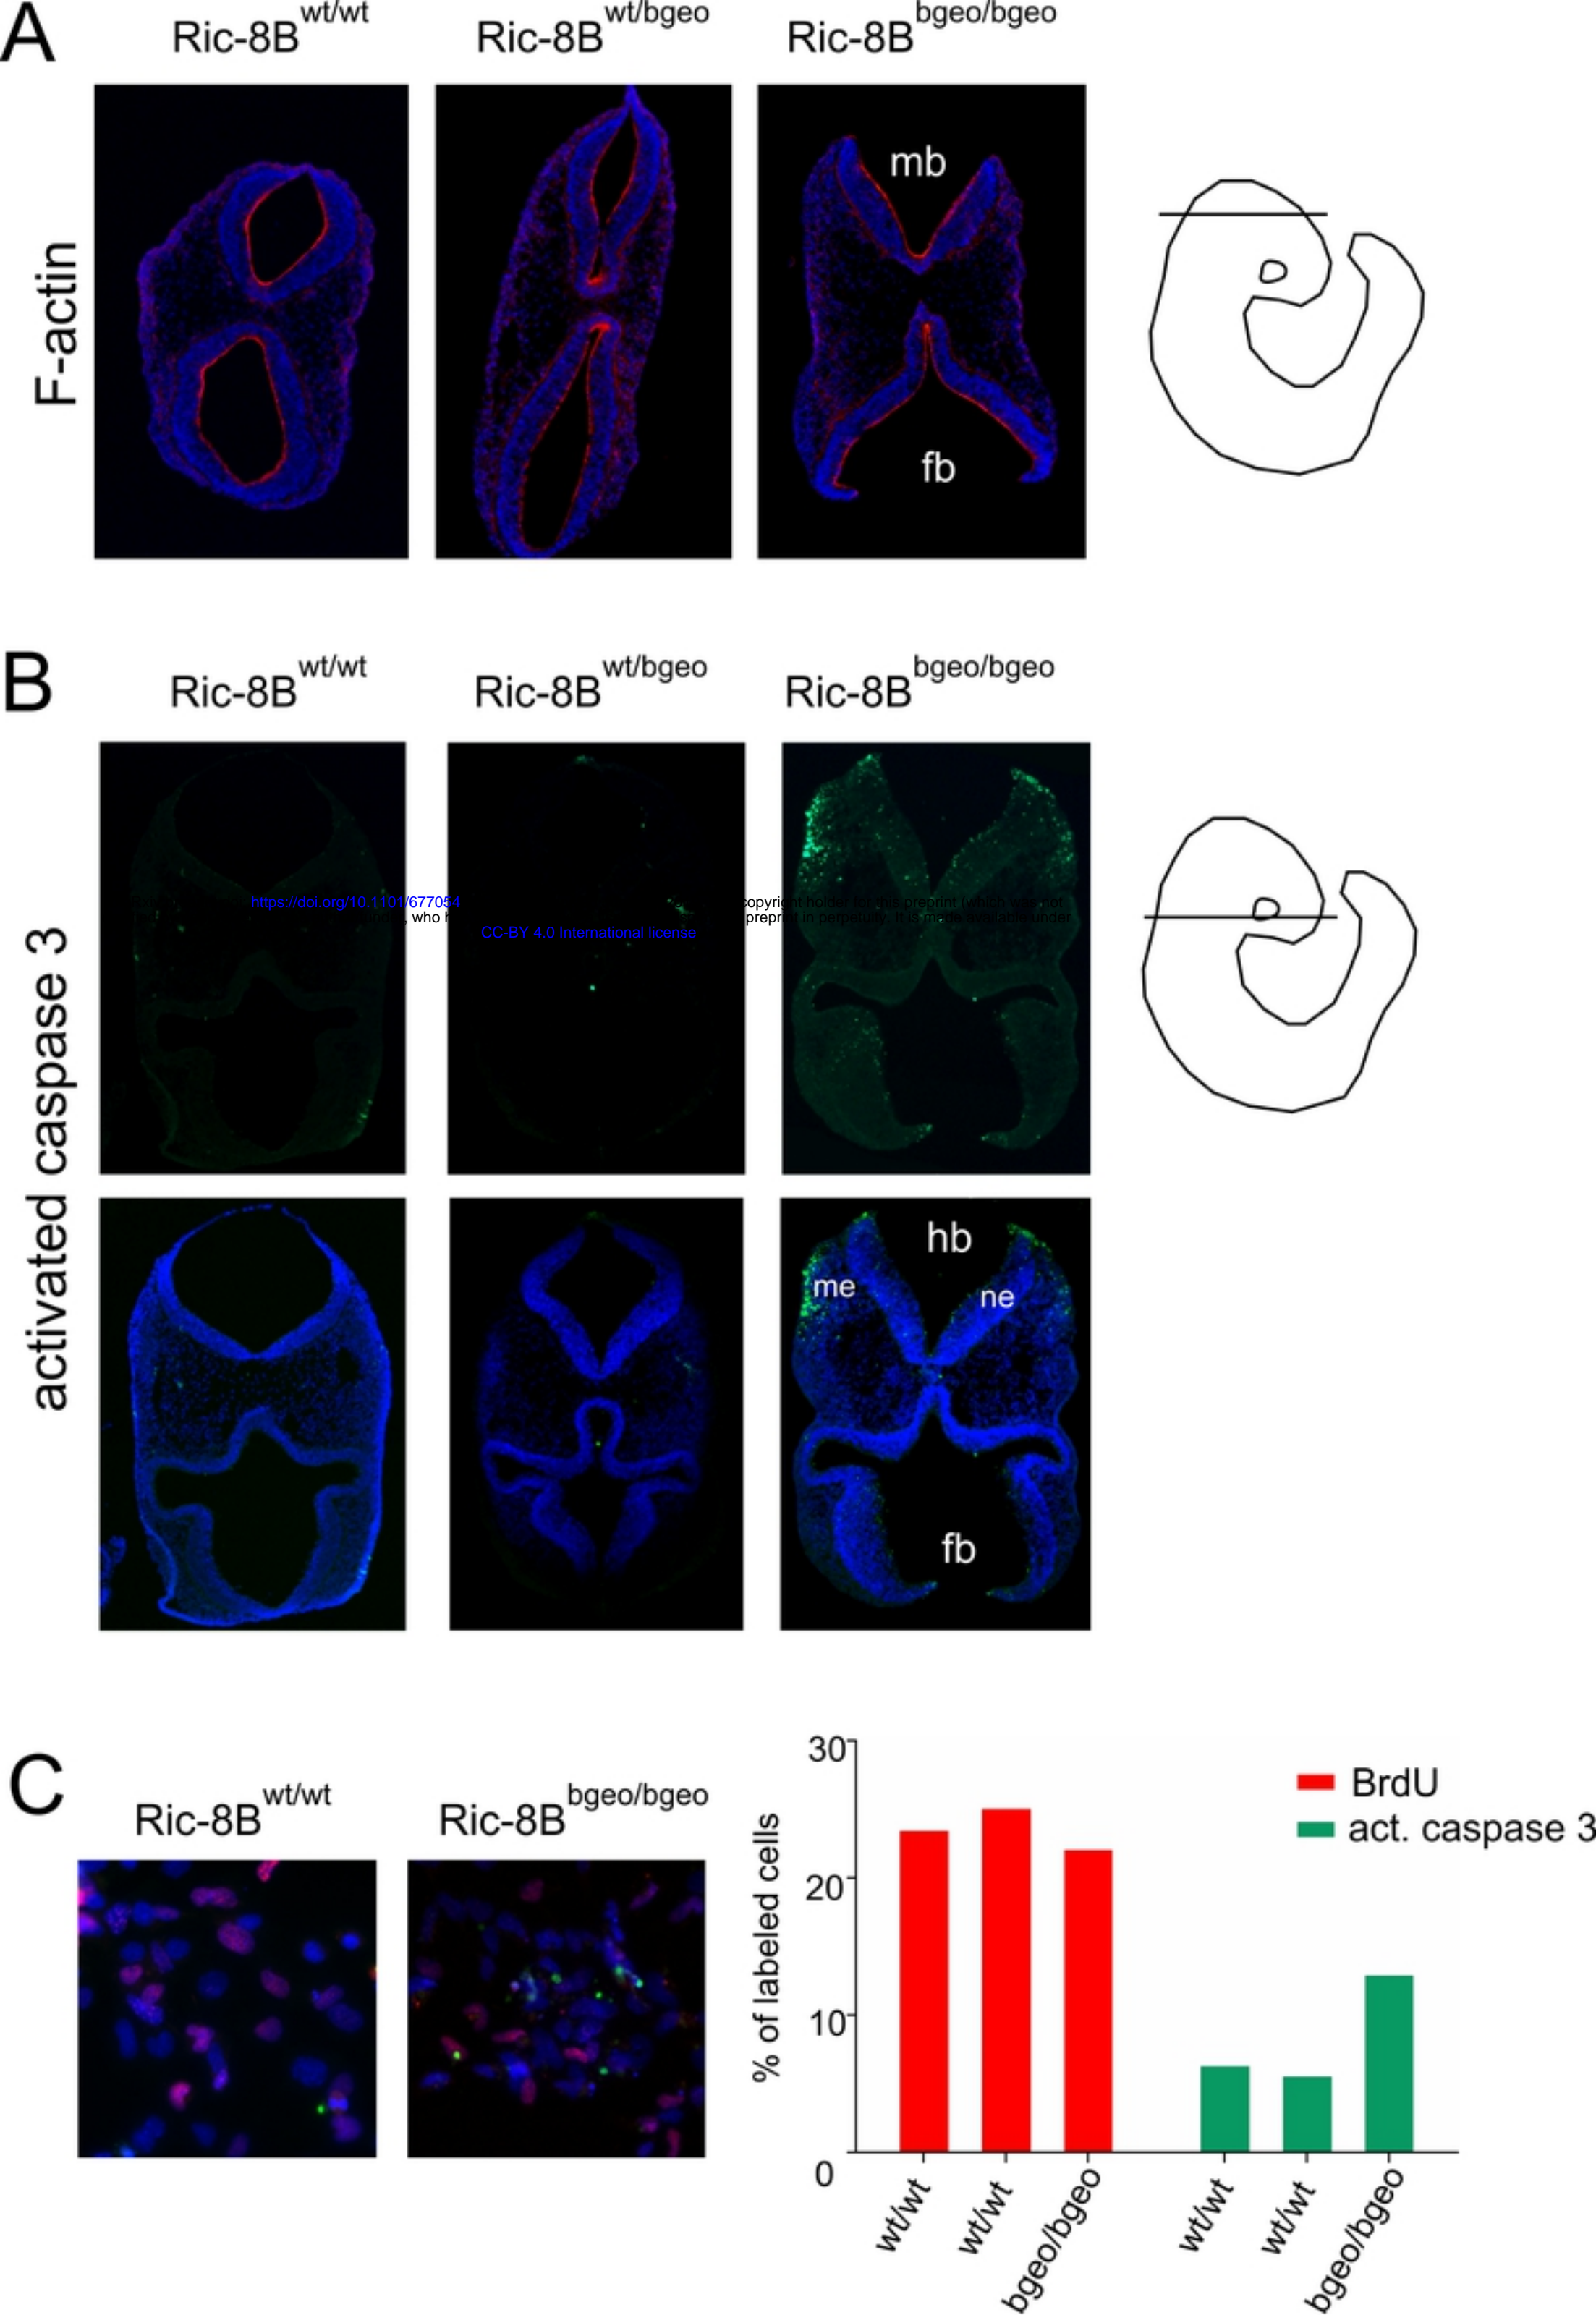

Figure 5

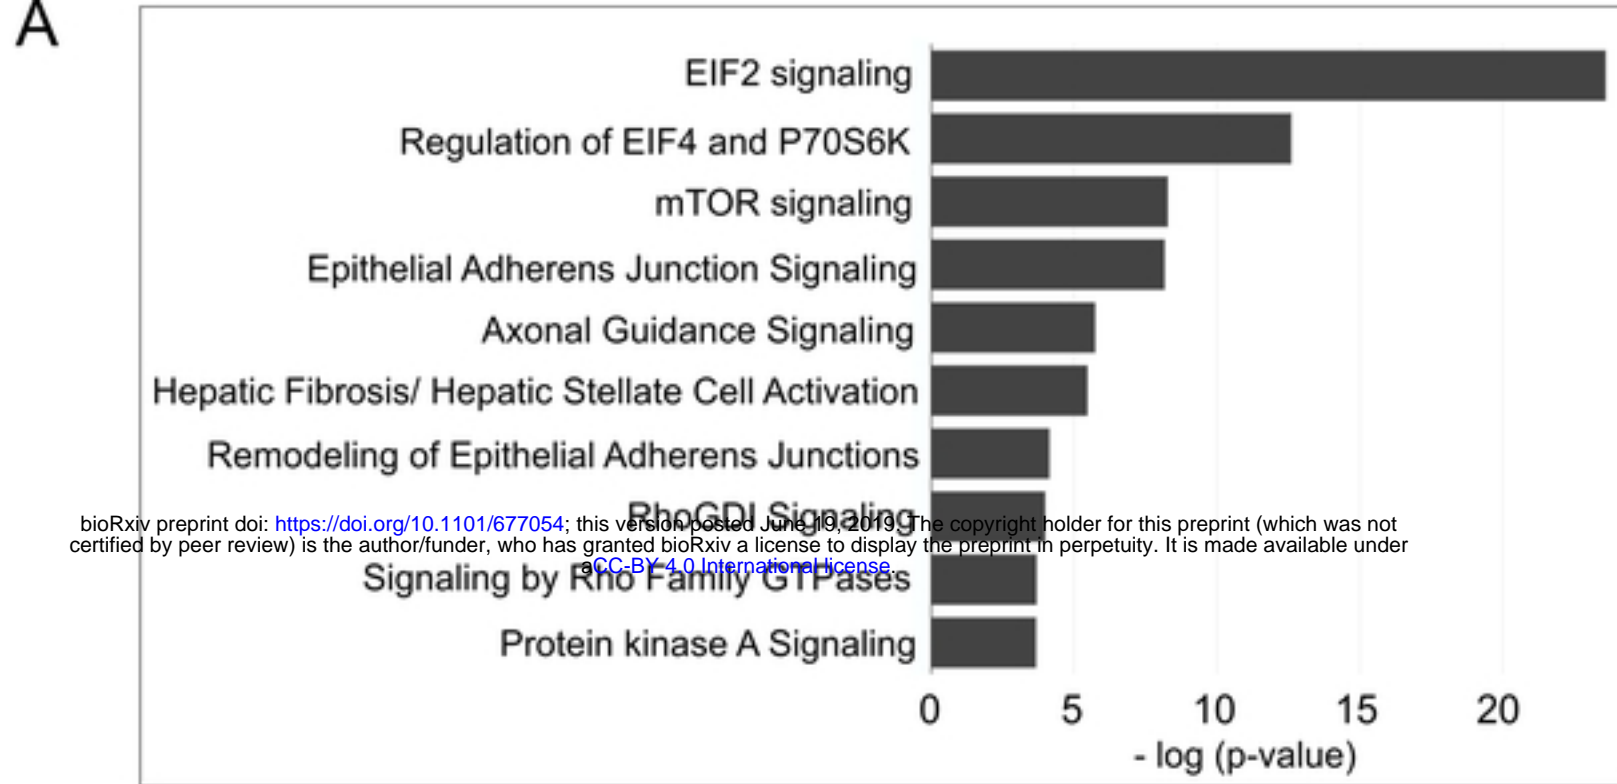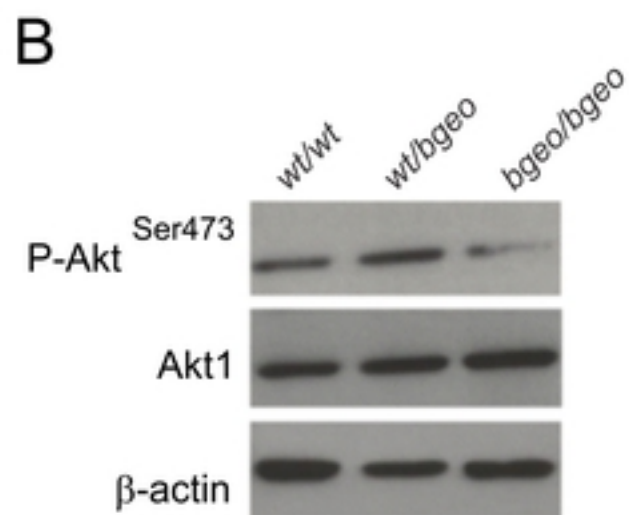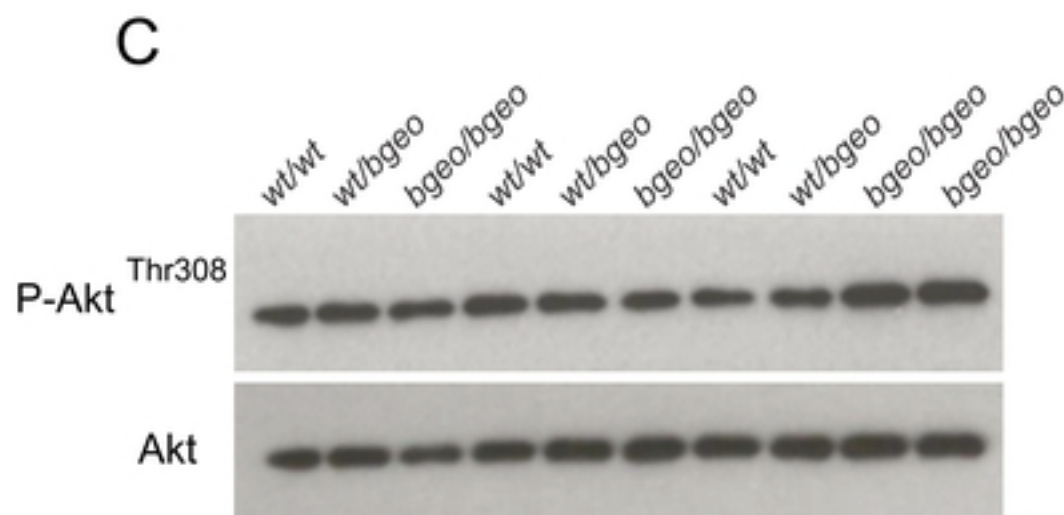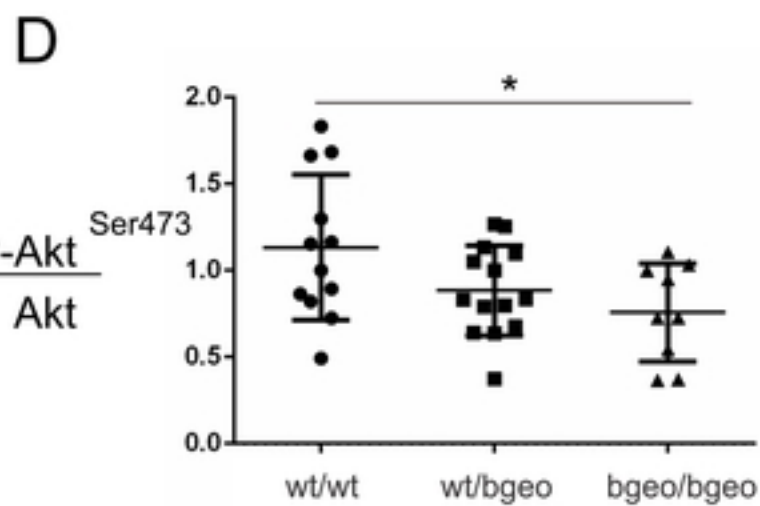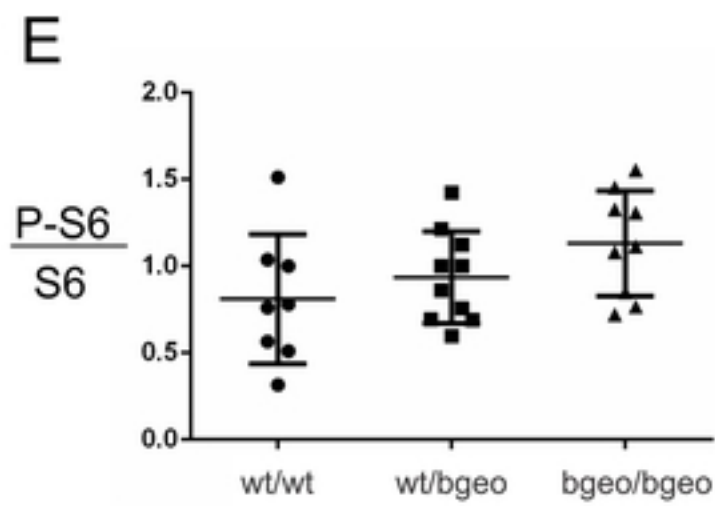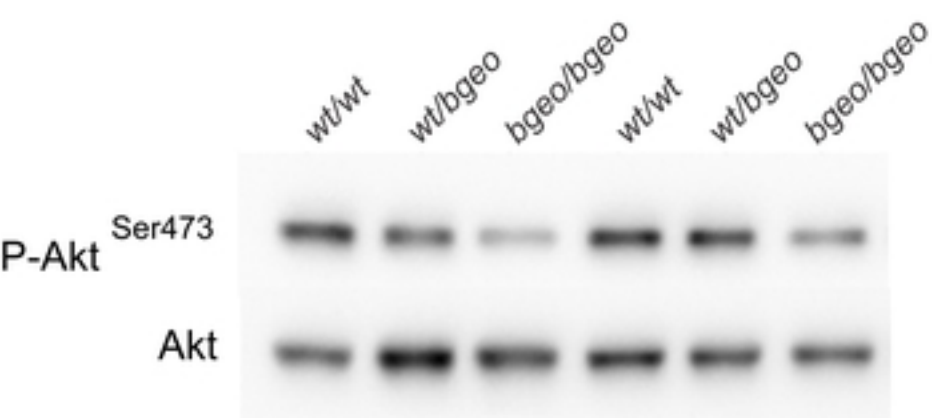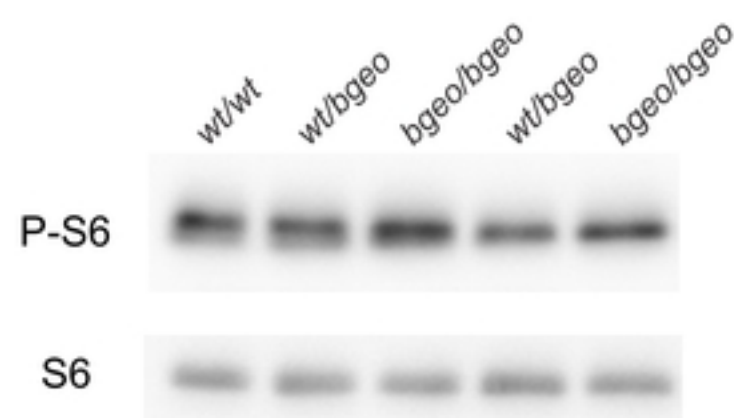

Figure 6
